# Supplementary material for: A simple approach to C3-ethoxycarbonylmethylation of thiophenes/furans with diethyl bromomalonate
Source: Royal Society of Chemistry journal article supplement (doi:10.1039/d2ob00835a), 2022-01-01
Supplement: d2ob00835a1.pdf [file d2ob00835a1.pdf]

*Supporting information for*

**A simple approach to C3-ethoxycarbonylmethylation  
of thiophenes/furans with diethyl bromomalonate**

Mengmeng Huang, Jingzhou Tang, Na li, Jung Keun Kim, Ming Gong, Jianye Zhang, Yabo Li\* and  
Yangjie Wu

*College of Chemistry, Henan Key Laboratory of Chemical Biology and Organic Chemistry, Key  
Laboratory of Applied Chemistry of Henan Universities, Zhengzhou University, Zhengzhou 450052,  
P.R. China.*

[ybli@zzu.edu.cn](mailto:ybli@zzu.edu.cn)

**Experimental details and spectroscopic data**

**Contents**

|                                                                                                                   |     |
|-------------------------------------------------------------------------------------------------------------------|-----|
| 1. General information.....                                                                                       | S2  |
| 2. Experimental procedures .....                                                                                  | S3  |
| 3. Control experiments.....                                                                                       | S3  |
| 4. UV-Vis absorption spectra, luminescence quenching experiments, cyclic voltammetry and<br>data processing ..... | S7  |
| 5. Characterization data .....                                                                                    | S11 |
| 6. References.....                                                                                                | S18 |
| 7. <sup>1</sup> H, <sup>13</sup> C and <sup>19</sup> F NMR spectra.....                                           | S19 |

## 1. General information

All reactions were performed using quartz tube. Commercial grade reagents and EtOH (OCEANPAK, GC  $\geq$  99.9%) were used without further purification except as indicated below. Solvents were dried and degassed by standard methods before they were used. Diethyl bromomalonate was purchased from commercial suppliers and Thiophenes (furans) were prepared according to reported procedures.<sup>1</sup> The progress of all reactions was monitored by thin-layer chromatography to ensure the reactions had reached completion. Analytical thin-layer chromatography (TLC) was performed on Merck silica gel aluminum plates with F-254 indicator, visualized by irradiation with UV light. Silica gel was purchased from Qing Dao Hai Yang Chemical Industry Co. The LCD Digital Hotplate Magnetic Stirrer MS-H-Pro<sup>+</sup> and Digital Single Channel Adjustable Automatic Electronic Pipette Micropipette dPetee<sup>+</sup> were purchased from Dragon Laboratory Instruments Limited. <sup>1</sup>H NMR spectra was recorded on a Bruker DPX-400 (400 MHz) spectrometer with deuterated chloroform as solution, the chemical shifts were quoted in parts per million (ppm) referenced to the appropriate solvent peak or 0.0 ppm for tetramethylsilane. <sup>13</sup>C NMR spectra was recorded at 100 MHz on Bruker DPX-400. The chemical shifts  $\delta$  are reported relative to residual CHCl<sub>3</sub> ( $\delta_C = 77.00$  ppm). <sup>19</sup>F NMR spectra was recorded at 376.5 MHz on Bruker DPX-400, the chemical shifts  $\delta$  are reported relative to CFCl<sub>3</sub> ( $\delta = 0$  ppm) as internal standard. The multiplicity of signals is designated by the following abbreviations: s (singlet), d (doublet), t (triplet), q (quartet), m (multiplet), dd = doublet of doublet, td = triplet of doublet. Coupling constants *J* are reported in Hertz (Hz). High resolution mass spectra (HRMS) were obtained on an Agilent LC-MSD-Trap-XCT spectrometer with micromass MS software using electrospray ionisation (ESI). The UV-Vis absorption spectra were recorded in DMSO on a Perkin Elmer Lambda 35 spectrometer. The cyclic voltammetry (CV) was recorded in DMSO by CHI650A. And the luminescence quenching experiment was recorded using a F-4500 FL spectrophotometer in DMSO. All reactions were carried out with photoreactor (Serial No: PEA12) which was purchased from LUOYANG JINFENG ELECTROMECHANICAL EQUIPMENT CO., LTD.

## 2. Experimental procedures

### General procedure for the C3-ethoxycarbonylmethylation of 2-phenyl-thiophenes (furans) with diethyl bromomalonate

2-Phenyl-thiophenes (furans) **1** (0.2 mmol), diethyl bromomalonate **2** (0.6 mmol, 3 equiv.) and  $\text{KH}_2\text{PO}_4$  (0.4 mmol, 2.0 equiv.), *fac*-Ir(ppy)<sub>3</sub> (0.001 mmol) were combined in EtOH (1.5 mL) under Ar atmosphere. The mixture was stirred at room temperature under 3 W blue LED. After 1 hour, the reaction mixture was extracted with dichloromethane and saturated salt water, the organic phase was dried over  $\text{Na}_2\text{SO}_4$  and concentrated under reduced pressure. Then, the crude products were purified through silica gel column chromatography using petroleum ether/ethyl acetate (50:1, v/v) as eluent to give the corresponding product **3**.

## 3. Control experiments

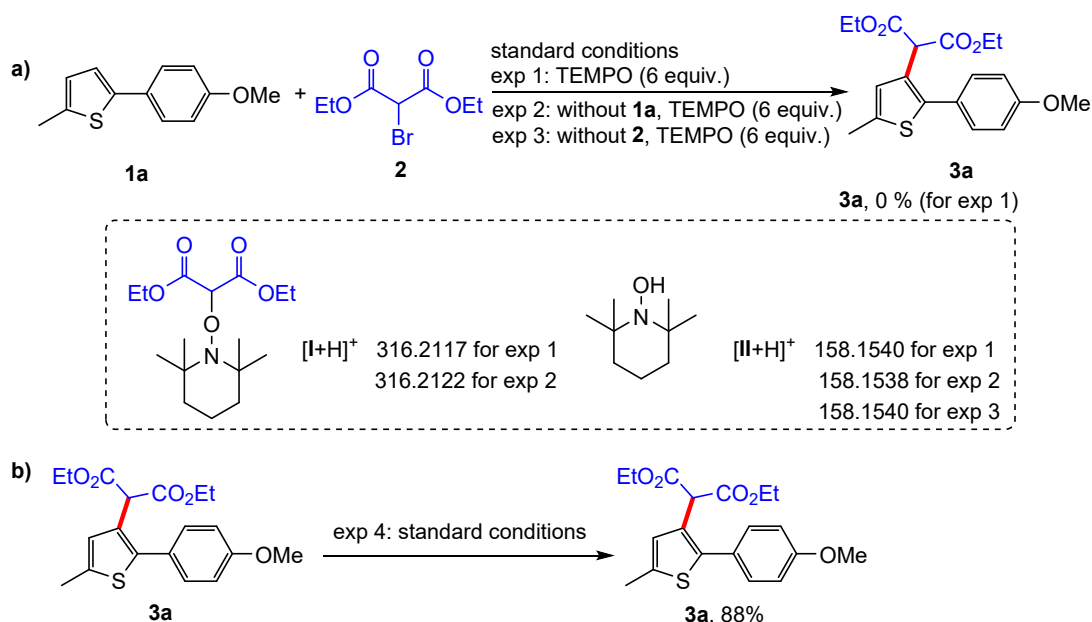

Scheme S1. Control experiments.

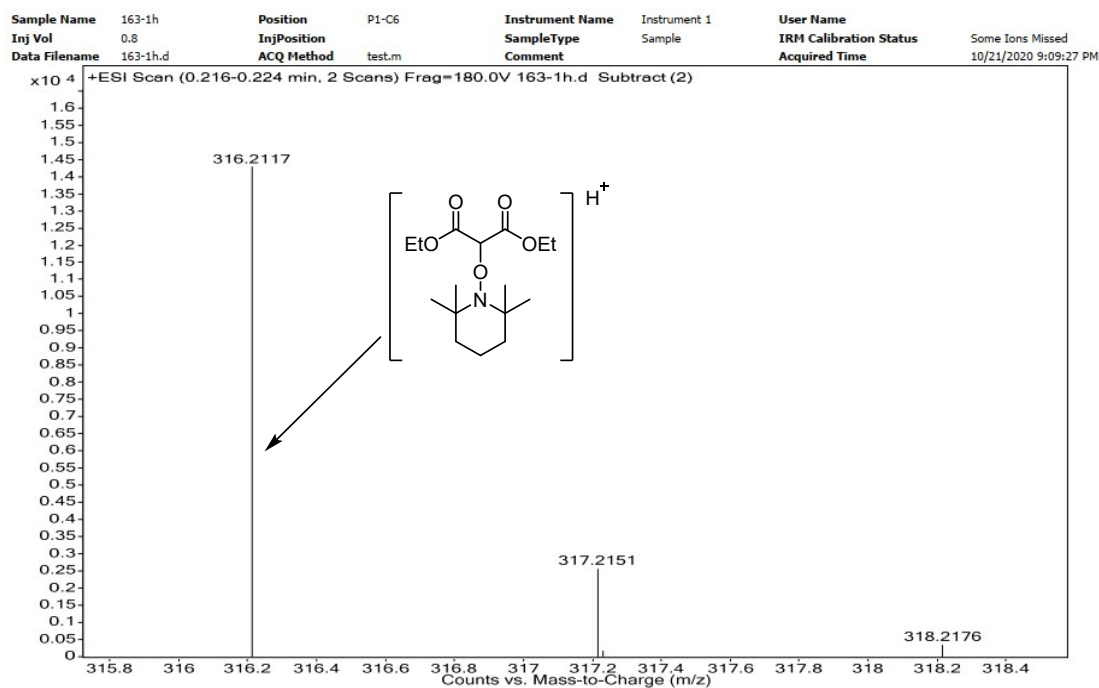

Figure S1. HRMS spectrum of compound  $[I + H]^+$  for exp 1

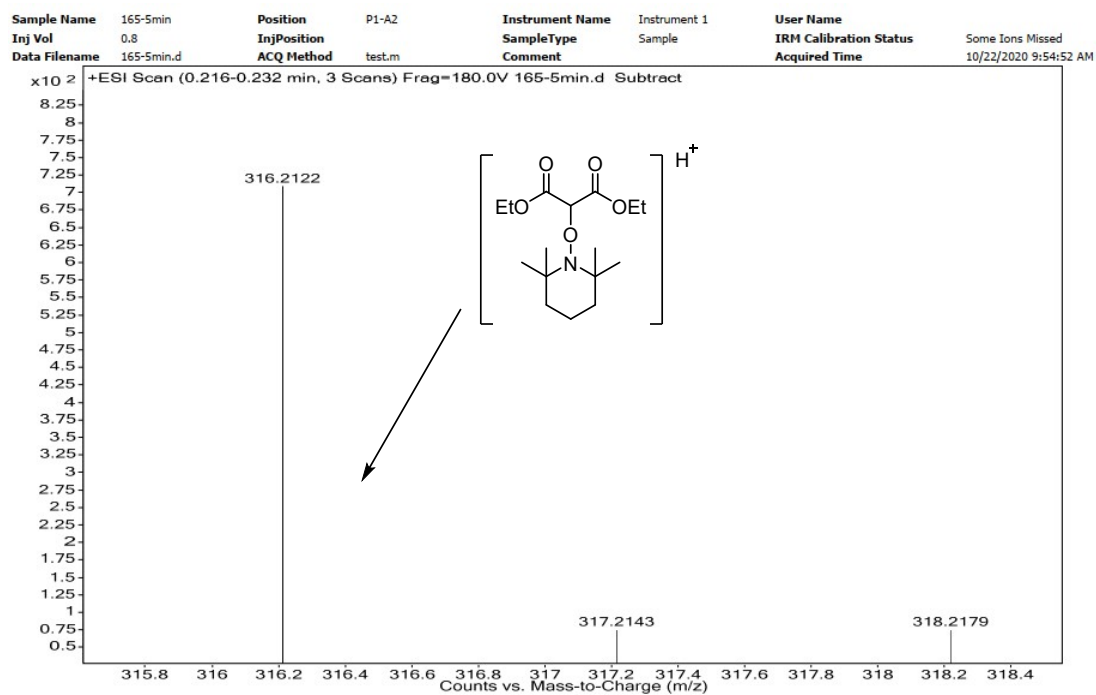

Figure S2. HRMS spectrum of compound  $[I + H]^+$  for exp 2

| Sample Name   | 163-15min   | Position    | P1-C3  | Instrument Name | Instrument 1 | User Name              |                       |
|---------------|-------------|-------------|--------|-----------------|--------------|------------------------|-----------------------|
| Inj Vol       | 0.8         | InjPosition |        | SampleType      | Sample       | IRM Calibration Status | Some Ions Missed      |
| Data Filename | 163-15min.d | ACQ Method  | test.m | Comment         |              | Acquired Time          | 10/21/2020 9:05:38 PM |

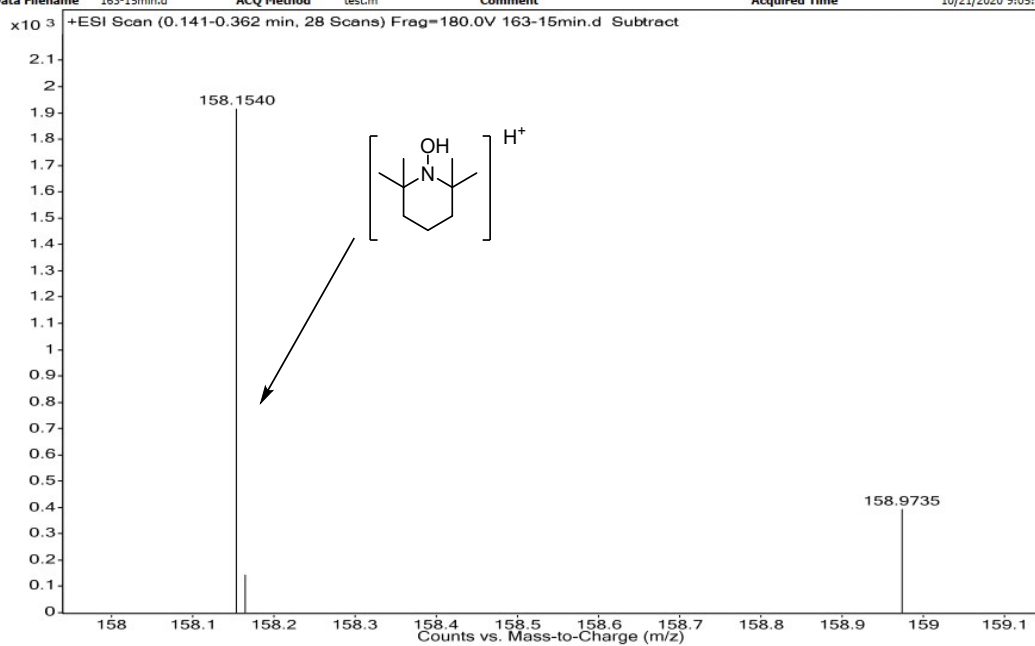

**Figure S3.** HRMS spectrum of compound  $[II + H]^+$  for exp 1

| Sample Name   | 165-20min   | Position    | P1-A3  | Instrument Name | Instrument 1 | User Name              |                        |
|---------------|-------------|-------------|--------|-----------------|--------------|------------------------|------------------------|
| Inj Vol       | 0.8         | InjPosition |        | SampleType      | Sample       | IRM Calibration Status | All Ions Missed        |
| Data Filename | 165-20min.d | ACQ Method  | test.m | Comment         |              | Acquired Time          | 10/22/2020 10:14:13 AM |

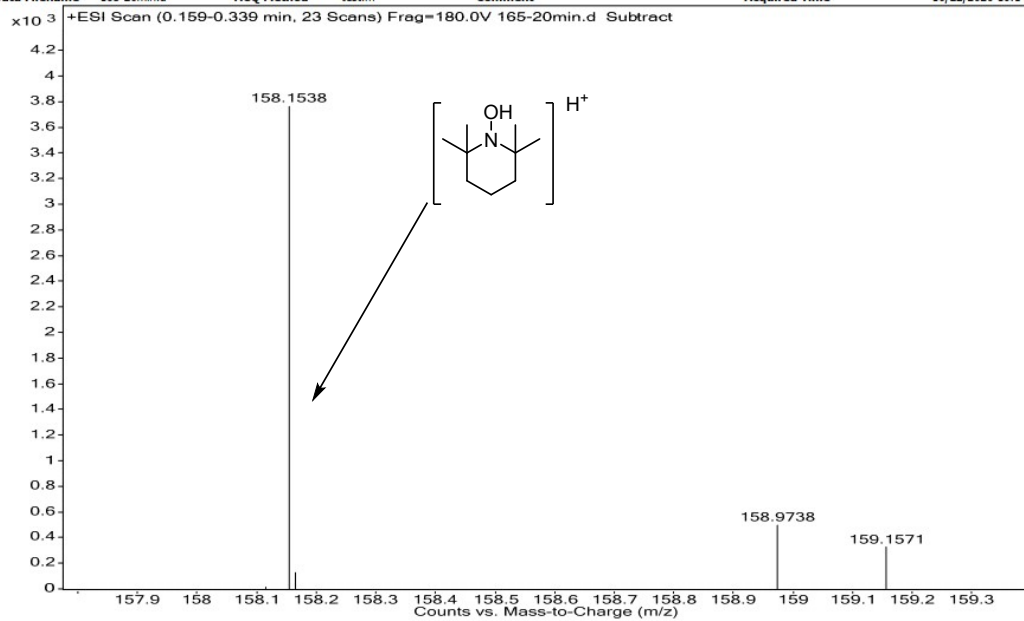

**Figure S4.** HRMS spectrum of compound  $[II + H]^+$  for exp 2

|               |            |             |        |                 |              |                        |                        |
|---------------|------------|-------------|--------|-----------------|--------------|------------------------|------------------------|
| Sample Name   | 167-5min   | Position    | P1-A6  | Instrument Name | Instrument 1 | User Name              |                        |
| Inj Vol       | 0.8        | InjPosition |        | SampleType      | Sample       | IRM Calibration Status | All Ions Missed        |
| Data Filename | 167-5min.d | ACQ Method  | test.m | Comment         |              | Acquired Time          | 10/22/2020 10:00:00 AM |

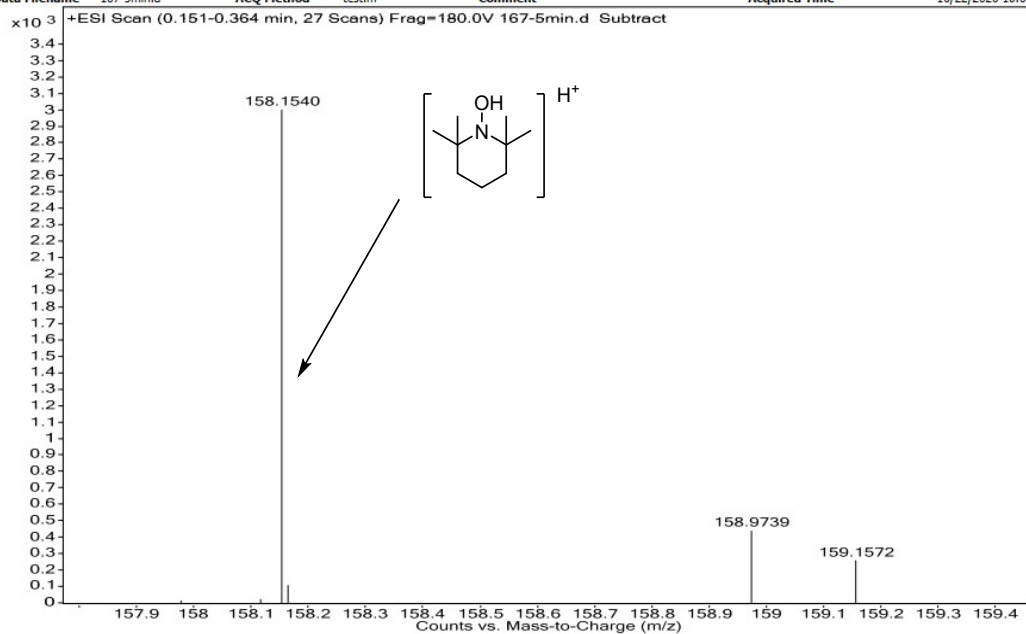

Figure S5. HRMS spectrum of compound  $[II + H]^+$  for exp 3

## 4. UV-Vis absorption spectra, luminescence quenching experiments, cyclic voltammetry and data processing

### 4.1 The UV-Vis absorption spectra

The UV-Vis absorption spectra were recorded in 10 mm path length quartz cuvette on a Perkin Elmer Lambda 35 spectrometer.

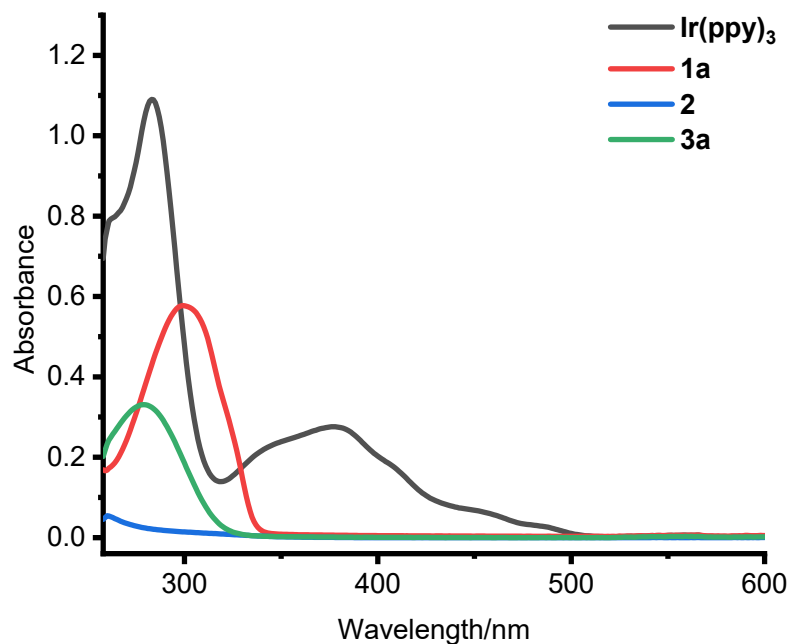

**Figure S6.** The UV-Vis absorption spectra of **Ir(ppy)<sub>3</sub>** ( $\lambda_{\text{max}} = 505$  nm), 2-(4-methoxyphenyl)-5-methylthiophene **1a** ( $\lambda_{\text{max}} = 342$  nm), diethyl bromomalonate **2** ( $\lambda_{\text{max}} = 262$  nm), **3a** ( $\lambda_{\text{max}} = 320$  nm) in DMSO (0.05 mM).

### 4.2 Luminescence quenching experiments

Emission intensities were recorded using a F-4500 FL spectrophotometer. First, Ir(ppy)<sub>3</sub> solution was excited at 379 nm and the emission/intensity at 522 nm was observed. In a typical experiment, the emission spectrum of a  $5 \times 10^{-5}$  M solution of Ir(ppy)<sub>3</sub> and different concentration of 2-(4-methoxyphenyl)-5-methylthiophene **1a**, diethyl bromomalonate **2** and **3a** in DMSO in 10 mm path length quartz cuvette were collected.

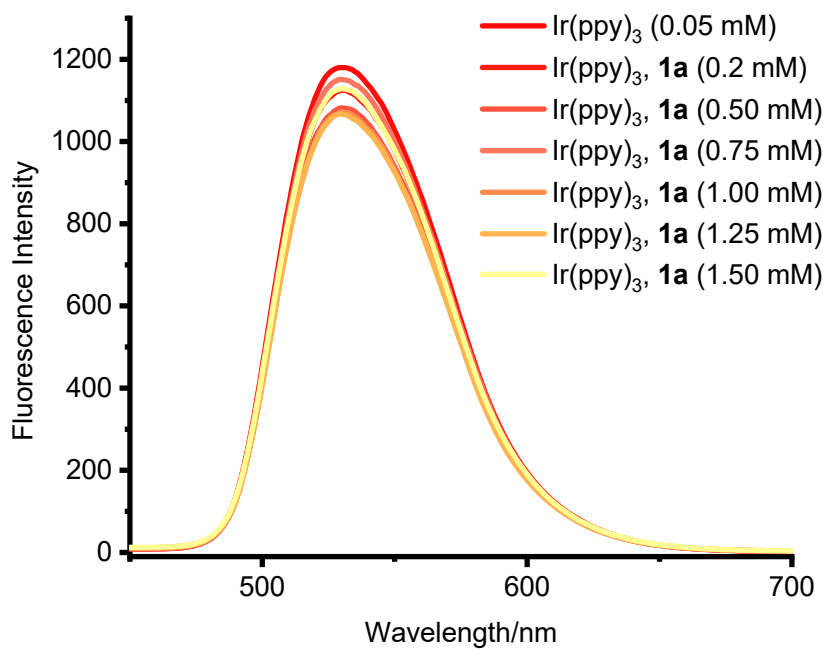

**Figure S7.** Luminescence quenching experiments of Ir(ppy)<sub>3</sub> with **1a**

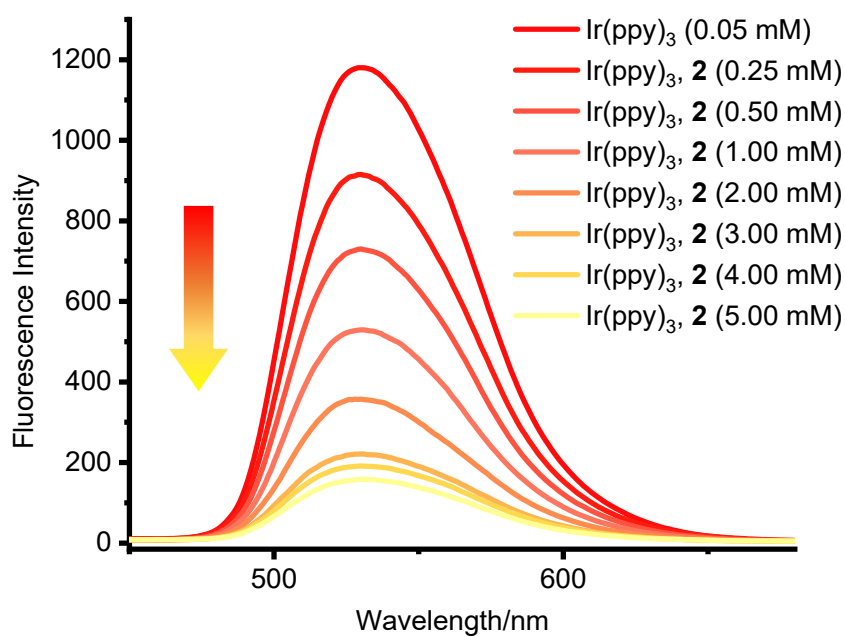

**Figure S8.** Luminescence quenching experiments of Ir(ppy)<sub>3</sub> with **2**



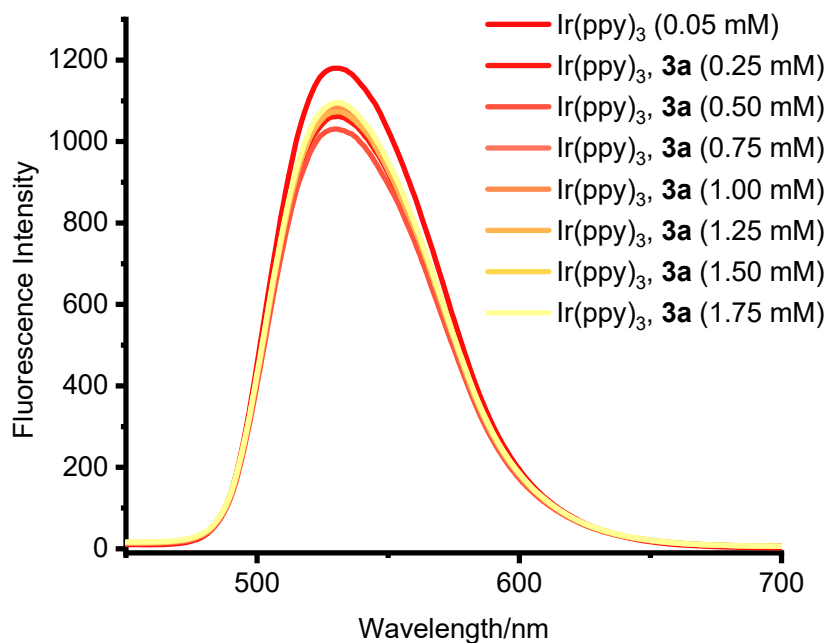

**Figure S9.** Luminescence quenching experiments of Ir(ppy)<sub>3</sub> with **3a**

### 4.3 Cyclic voltammetry

Cyclic voltammetry was measured under Ar balloon protection with conventional three-electrode system (reference electrode: Ag/AgCl, working electrode: glassy carbon, counter electrode: Pt wire, electrolyte: 0.1 M TBAPF<sub>6</sub> in DMSO) at 50 mV/sec of scan rate.

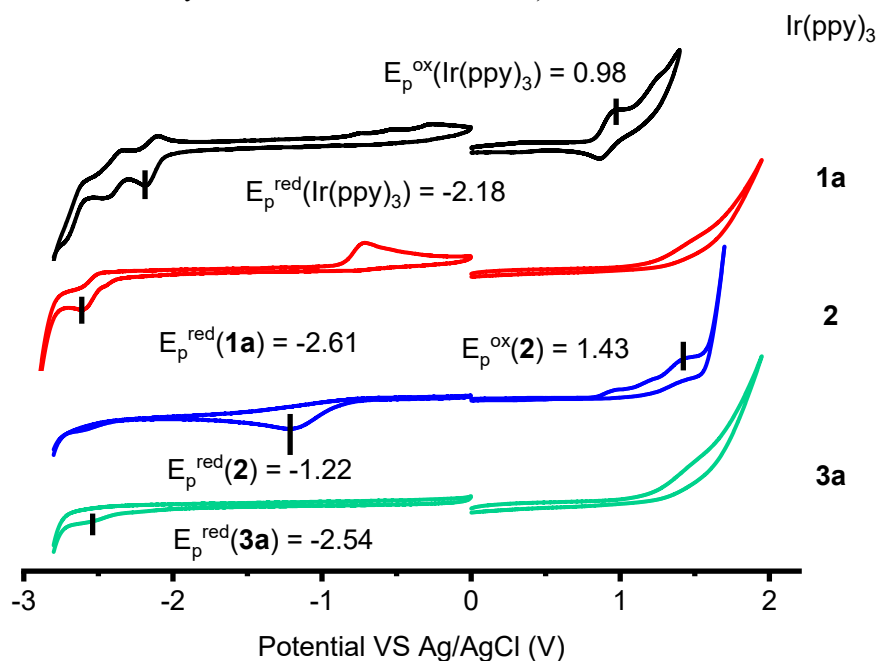

**Figure S10.** CV of reaction reagents (1 mM in DMSO)

#### 4.4 Data processing

We could see the reversible reduction waves of all the reagents. With these data in hand, we calculated the excited redox potential,  $E_g$  by CV and UV absorption spectrometry theory.

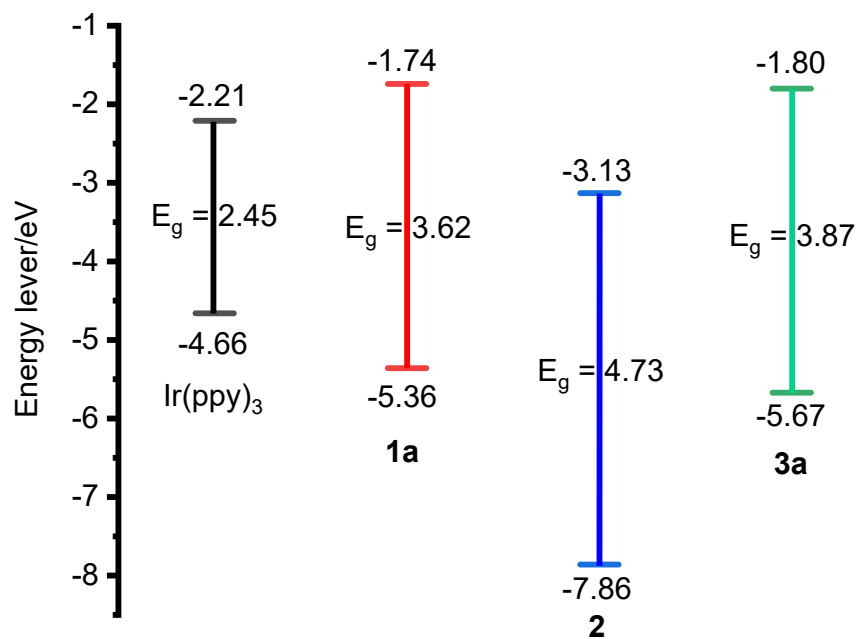

**Figure S11.** The  $E_{HOMO}$ ,  $E_{LUMO}$  and  $E_g$  of different reagents

## 5. Characterization data

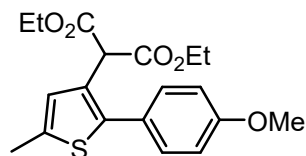

### diethyl 2-(2-(4-methoxyphenyl)-5-methylthiophen-3-yl)malonate (3a)

White solid (56.5 mg, 78%), mp. 52-53 °C. <sup>1</sup>H NMR (400 MHz, CDCl<sub>3</sub>): δ 7.33-7.37 (m, 2H), 6.91-6.96 (m, 3H), 4.72 (s, 1H), 4.15-4.25 (m, 4H), 3.84 (s, 1H), 3.47 (s, 3H) 1.26 (t, *J* = 7.0 Hz, 6H). <sup>13</sup>C NMR (100 MHz, CDCl<sub>3</sub>): δ 168.3, 159.4, 140.0, 138.0, 130.9, 127.2, 126.8, 125.8, 114.1, 61.8, 55.3, 51.4, 15.4, 14.0. HRMS (ESI) calcd. for C<sub>19</sub>H<sub>22</sub>O<sub>5</sub>S (M+Na)<sup>+</sup>: 385.1081, found: 385.1079.

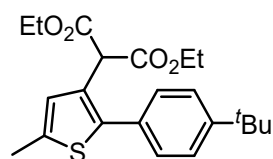

### diethyl 2-(2-(4-(*tert*-butyl)phenyl)-5-methylthiophen-3-yl)malonate (3b)

Yellow oil (54.6 mg, 70%). <sup>1</sup>H NMR (400 MHz, CDCl<sub>3</sub>): δ 7.40-7.45 (m, 2H), 7.33-7.38 (m, 2H), 6.95 (d, *J* = 1.1 Hz, 1H), 4.78 (s, 1H), 4.15-4.26 (m, 4H), 2.48 (d, *J* = 1.0 Hz, 3H), 1.35 (s, 9H), 1.27 (t, *J* = 7.1 Hz, 6H). <sup>13</sup>C NMR (100 MHz, CDCl<sub>3</sub>): δ 168.3, 150.8, 140.2, 138.2, 130.5, 129.3, 127.2, 127.0, 125.6, 61.7, 51.5, 34.6, 31.3, 15.4, 14.0. HRMS (ESI) calcd. for C<sub>22</sub>H<sub>28</sub>O<sub>4</sub>S (M+H)<sup>+</sup>: 389.1781, found: 389.1780

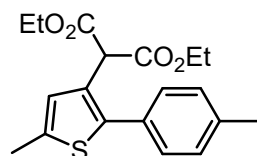

### diethyl 2-(5-methyl-2-(*p*-tolyl)thiophen-3-yl)malonate (3c)

Yellow oil (51.4 mg, 74%). <sup>1</sup>H NMR (400 MHz, CDCl<sub>3</sub>): δ 7.32 (d, 2H), 7.22 (d, 1H), 6.95 (d, *J* = 1.0 Hz, 1H), 4.75 (s, 1H), 4.15-4.25 (m, 4H), 2.48 (d, *J* = 1.0 Hz, 3H), 2.38 (s, 3H), 1.26 (t, *J* = 7.2 Hz, 6H). <sup>13</sup>C NMR (100 MHz, CDCl<sub>3</sub>): δ 168.2, 140.2, 138.2, 137.8, 130.5, 129.5, 129.4, 127.2, 126.9, 61.7, 51.4, 21.2, 15.4, 14.0. HRMS (ESI) calcd. for C<sub>19</sub>H<sub>22</sub>O<sub>4</sub>S (M+Na)<sup>+</sup>: 369.1131, found: 369.1131.

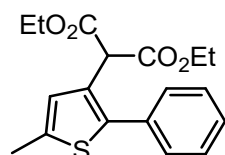

### diethyl 2-(5-methyl-2-phenylthiophen-3-yl)malonate (3d)

White solid (44.4 mg, 67%), mp. 78-80 °C. <sup>1</sup>H NMR (400 MHz, CDCl<sub>3</sub>): δ 7.38-7.45 (m, 4H), 7.33-7.37 (m, 1H), 6.96 (d, *J* = 1.1 Hz, 1H), 4.76 (s, 1H), 4.15-4.26 (m, 4H), 2.49 (d, *J* = 1.0 Hz, 3H), 1.26 (t, *J* = 7.1 Hz, 6H). <sup>13</sup>C NMR (100 MHz, CDCl<sub>3</sub>): δ 168.2, 140.1, 138.6, 133.5, 129.7, 128.7, 127.9, 127.5, 127.0, 61.8, 51.4, 15.4, 14.0. HRMS (ESI) calcd. for C<sub>18</sub>H<sub>20</sub>O<sub>4</sub>S (M+Na)<sup>+</sup>: 355.0975, found: 355.0975.

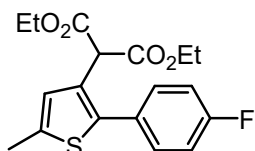

**diethyl 2-(2-(4-fluorophenyl)-5-methylthiophen-3-yl)malonate (3e)**

White solid (39.9 mg, 57%), mp. 80-81 °C. <sup>1</sup>H NMR (400 MHz, CDCl<sub>3</sub>): δ 7.37-7.44 (m, 2H), 7.07-7.14 (m, 2H), 6.95 (d, *J* = 1.1 Hz, 1H), 4.67 (s, 1H), 4.14-4.26 (m, 4H), 2.48 (d, *J* = 1.0 Hz, 3H), 1.26 (t, *J* = 7.1 Hz, 6H). <sup>13</sup>C NMR (100 MHz, CDCl<sub>3</sub>): δ 168.1, 162.6 (d, *J* = 247.9 Hz), 138.8, 138.7, 131.4 (d, *J* = 8.1 Hz), 129.4 (d, *J* = 3.7 Hz), 127.8, 126.9, 115.7 (d, *J* = 3.7 Hz), 61.9, 51.4, 15.4, 14.0. <sup>19</sup>F NMR (376.5 MHz, CDCl<sub>3</sub>): δ -113.9. HRMS (ESI) calcd. for C<sub>18</sub>H<sub>19</sub>FO<sub>4</sub>S (M+Na)<sup>+</sup>: 373.0881, found: 373.0880.

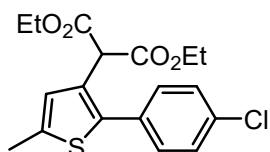

**diethyl 2-(2-(4-chlorophenyl)-5-methylthiophen-3-yl)malonate (3f)**

White solid (50.5 mg, 69%), mp. 79-80 °C. <sup>1</sup>H NMR (400 MHz, CDCl<sub>3</sub>): δ 7.34-7.43 (m, 4H), 6.96 (d, *J* = 1.0 Hz, 1H), 4.68 (s, 1H), 4.15-4.26 (m, 4H), 2.48 (d, *J* = 1.0 Hz, 3H), 1.26 (t, *J* = 7.2 Hz, 6H). <sup>13</sup>C NMR (100 MHz, CDCl<sub>3</sub>): δ 168.0, 139.0, 138.7, 134.1, 131.9, 130.9, 128.9, 128.0, 127.1, 61.9, 51.4, 15.4, 14.0. HRMS (ESI) calcd. for C<sub>18</sub>H<sub>19</sub>ClO<sub>4</sub>S (M+H)<sup>+</sup>: 367.0766, found: 367.0764.

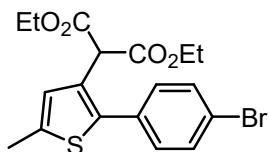

**diethyl 2-(2-(4-bromophenyl)-5-methylthiophen-3-yl)malonate (3g)**

White solid (54.9 mg, 67%), mp. 80-81 °C. <sup>1</sup>H NMR (400 MHz, CDCl<sub>3</sub>): δ 7.51-7.56 (m, 2H), 7.27-7.33 (m, 2H), 6.97 (d, *J* = 1.0 Hz, 1H), 4.68 (s, 1H), 4.15-4.26 (m, 4H), 2.48 (d, *J* = 1.0 Hz, 3H), 1.26 (t, *J* = 7.1 Hz, 6H). <sup>13</sup>C NMR (100 MHz, CDCl<sub>3</sub>): δ 168.0, 139.1, 138.7, 132.4, 131.9, 131.2, 128.0, 127.1, 122.2, 61.9, 51.4, 15.4, 14.0. HRMS (ESI) calcd. for C<sub>18</sub>H<sub>19</sub>BrO<sub>4</sub>S (M+H)<sup>+</sup>: 411.0261, found: 411.0259.

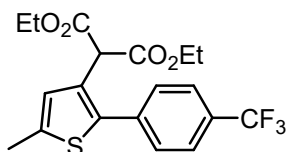

**diethyl 2-(5-methyl-2-(4-(trifluoromethyl)phenyl)thiophen-3-yl)malonate (3h)**

White solid (36.1 mg, 45%), mp. 95-96 °C. <sup>1</sup>H NMR (400 MHz, CDCl<sub>3</sub>): δ 7.67 (d, *J* = 8.2 Hz, 2H), 7.56 (d, *J* = 8.1 Hz, 2H), 7.00 (d, *J* = 1.0 Hz, 1H), 4.70 (s, 1H), 4.14-4.27 (m, 4H), 2.51 (d, *J* = 0.9 Hz, 3H), 1.27 (t, *J* = 7.2 Hz, 6H). <sup>13</sup>C NMR (100 MHz, CDCl<sub>3</sub>): δ 167.9, 139.8, 138.3, 137.2, 129.9 (d, *J* = 32.3 Hz), 128.5, 127.4, 125.7 (q, *J* = 7.3 Hz), 124.1 (d, *J* = 272.2 Hz), 62.0, 51.4, 15.4, 14.0. <sup>19</sup>F NMR (376.5 MHz, CDCl<sub>3</sub>): δ -62.6. HRMS (ESI) calcd. for C<sub>19</sub>H<sub>19</sub>FO<sub>4</sub>S (M+H)<sup>+</sup>: 401.0829, found: 401.0829.

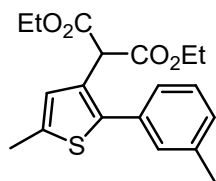

**diethyl 2-(5-methyl-2-(m-tolyl)thiophen-3-yl)malonate (3i)**

Yellow oil (46.4 mg, 67%). <sup>1</sup>H NMR (400 MHz, CDCl<sub>3</sub>): δ 7.30 (t, *J* = 7.5 Hz, 1H), 7.20-7.27 (m, 2H), 7.17 (d, *J* = 7.5 Hz, 1H), 6.96 (d, *J* = 0.7 Hz, 1H), 4.77 (s, 1H), 4.14-4.27 (m, 4H), 2.48 (d, *J* = 0.9 Hz, 3H), 2.39 (s, 3H), 1.27 (t, *J* = 7.1 Hz, 6H). <sup>13</sup>C NMR (100 MHz, CDCl<sub>3</sub>): δ 168.3, 140.3, 138.4, 138.4, 133.4, 130.4, 128.7, 128.6, 127.4, 126.9, 126.7, 61.8, 51.4, 21.5, 15.4, 14.0. HRMS (ESI) calcd. for C<sub>19</sub>H<sub>22</sub>O<sub>4</sub>S (M+Na)<sup>+</sup>: 369.1131, found: 369.1130.

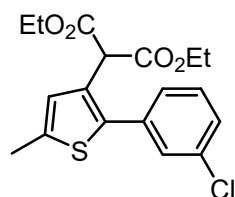

**diethyl 2-(2-(3-chlorophenyl)-5-methylthiophen-3-yl)malonate (3j)**

Yellow oil (49.8 mg, 68%). <sup>1</sup>H NMR (400 MHz, CDCl<sub>3</sub>): δ 7.44-7.46 (m, 1H), 7.30-7.36 (m, 3H), 6.97 (d, *J* = 1.0 Hz, 1H), 4.71 (s, 1H), 4.15-4.27 (m, 4H), 2.49 (d, *J* = 1.0 Hz, 3H), 1.28 (t, *J* = 7.2 Hz, 6H). <sup>13</sup>C NMR (100 MHz, CDCl<sub>3</sub>): δ 168.0, 139.3, 138.3, 135.2, 134.5, 130.0, 129.7, 128.2, 128.0, 127.8, 127.1, 61.9, 51.4, 15.4, 14.0. HRMS (ESI) calcd. for C<sub>18</sub>H<sub>19</sub>ClO<sub>4</sub>S (M+H)<sup>+</sup>: 367.0766, found: 367.0764.

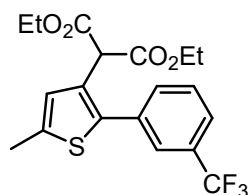

**diethyl 2-(5-methyl-2-(3-(trifluoromethyl)phenyl)thiophen-3-yl)malonate (3k)**

White solid (38.4 mg, 48%), mp. 58-59 °C. <sup>1</sup>H NMR (400 MHz, CDCl<sub>3</sub>): δ 7.72 (s, 1H), 7.62 (d, *J* = 7.1 Hz, 2H), 7.00 (d, *J* = 1.0 Hz, 1H), 4.70 (s, 1H), 4.14-4.27 (m, 4H), 2.50 (d, *J* = 0.9 Hz, 3H), 1.27 (t, *J* = 7.2 Hz, 6H). <sup>13</sup>C NMR (100 MHz, CDCl<sub>3</sub>): δ 167.9, 139.6, 138.1, 134.3, 132.9, 131.1 (d, *J* = 32.3 Hz), 129.3, 128.5, 127.2, 126.4 (q, *J* = 7.3 Hz), 124.6 (q, *J* = 7.3 Hz), 123.9 (d, *J* = 272.1 Hz), 62.0, 51.4, 15.4, 14.0. <sup>19</sup>F NMR (376.5 MHz, CDCl<sub>3</sub>): δ -62.7. HRMS (ESI) calcd. for C<sub>19</sub>H<sub>19</sub>FO<sub>4</sub>S (M+Na)<sup>+</sup>: 423.0849, found: 423.0849.

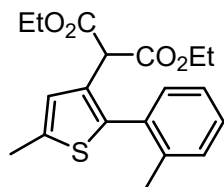

**diethyl 2-(5-methyl-2-(o-tolyl)thiophen-3-yl)malonate (3l)**

Yellow oil (17.3 mg, 25%). <sup>1</sup>H NMR (400 MHz, CDCl<sub>3</sub>): δ 7.27-7.32 (m, 1H), 7.25-7.27 (m, 1H), 7.19-7.23 (m, 2H), 6.93 (d, *J* = 1.0 Hz, 1H), 4.12-4.22 (m, 4H), 2.49 (d, *J* = 0.9 Hz, 3H), 2.19 (s, 3H), 1.23 (t, *J* = 7.1 Hz, 6H). <sup>13</sup>C NMR (100 MHz, CDCl<sub>3</sub>): δ 168.1, 138.7, 138.5, 132.5, 131.7, 130.1, 130.1, 129.1, 128.7, 125.6, 125.6, 61.6, 51.6, 20.1, 15.4, 14.0. HRMS

(ESI) calcd. for  $C_{19}H_{22}O_4S$  ( $M+H$ )<sup>+</sup>: 369.1131, found: 369.1131.

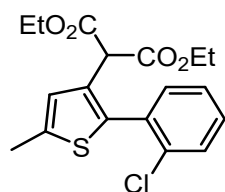

**diethyl 2-(2-(2-chlorophenyl)-5-methylthiophen-3-yl)malonate (3m)**

Yellow oil (17.6 mg, 24%). <sup>1</sup>H NMR (400 MHz, CDCl<sub>3</sub>): δ 7.47 (dd,  $J_1 = 7.4$  Hz,  $J_2 = 1.5$  Hz, 1H), 7.28-7.37 (m, 3H), 6.98 (d,  $J = 1.1$  Hz, 1H), 4.37 (s, 1H), 4.13-4.24 (m, 4H), 2.51 (d,  $J = 1.1$  Hz, 3H), 1.23 (t,  $J = 7.1$  Hz, 6H). <sup>13</sup>C NMR (100 MHz, CDCl<sub>3</sub>): δ 167.8, 139.6, 136.9, 135.0, 133.2, 132.0, 130.1, 129.9, 129.8, 126.6, 126.1, 61.7, 51.8, 15.5, 14.0. HRMS (ESI) calcd. for  $C_{18}H_{19}ClO_4S$  ( $M+Na$ )<sup>+</sup>: 389.0585, found: 389.0584.

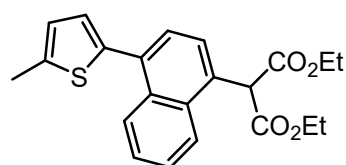

**diethyl 2-(4-(5-methylthiophen-2-yl)naphthalen-2-yl)malonate (3n)**

Yellow oil (45.8 mg, 60%). <sup>1</sup>H NMR (400 MHz, CDCl<sub>3</sub>): δ 8.32 (dd,  $J_1 = 8.3$  Hz,  $J_2 = 0.7$  Hz, 1H), 7.99 (d,  $J = 8.4$  Hz, 1H), 7.45-7.59 (m, 4H), 7.01 (d,  $J = 3.4$  Hz, 1H), 6.80-6.84 (m, 1H), 5.44 (s, 1H), 4.20-4.30 (m, 4H), 2.56 (d,  $J = 0.7$  Hz, 3H), 1.27 (t,  $J = 7.1$  Hz, 6H). <sup>13</sup>C NMR (100 MHz, CDCl<sub>3</sub>): δ 168.5, 140.5, 139.1, 133.07, 132.4, 132.0, 129.2, 127.6, 127.6, 127.0, 126.7, 126.5, 126.2, 125.5, 123.0, 62.0, 54.5, 15.3, 14.1. HRMS (ESI) calcd. for  $C_{22}H_{22}O_4S$  ( $M+H$ )<sup>+</sup>: 383.1312, found: 383.1316.

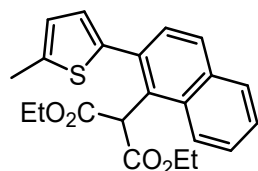

**diethyl 2-(2-(5-methylthiophen-2-yl)naphthalen-1-yl)malonate (3o)**

Yellow oil (47.4 mg, 62%). <sup>1</sup>H NMR (400 MHz, CDCl<sub>3</sub>): δ 8.10 (d,  $J = 8.1$  Hz, 1H), 7.77-7.86 (m, 2H), 7.44-7.54 (m, 3H), 6.89 (d,  $J = 3.4$  Hz, 1H), 6.75-6.78 (m, 1H), 5.61 (s, 1H), 4.12-4.21 (m, 4H), 2.54 (d,  $J = 0.7$  Hz, 3H), 1.16 (t,  $J = 7.1$  Hz, 6H). <sup>13</sup>C NMR (100 MHz, CDCl<sub>3</sub>): δ 168.8, 141.3, 140.1, 134.4, 133.7, 132.3, 128.9, 128.8, 128.5, 128.5, 128.0, 126.5, 126.2, 126.0, 125.4, 61.7, 54.2, 15.3, 14.0. HRMS (ESI) calcd. for  $C_{22}H_{22}O_4S$  ( $M+H$ )<sup>+</sup>: 383.1312, found: 383.1313.

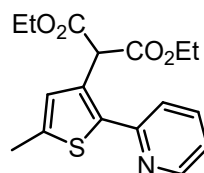

**diethyl 2-(5-methyl-2-(pyridin-2-yl)thiophen-3-yl)malonate (3p)**

Yellow oil (12.0 mg, 18%). <sup>1</sup>H NMR (400 MHz, CDCl<sub>3</sub>): δ 8.57 (m, 1H), 7.66 (td,  $J_1 = 7.8$  Hz,  $J_2 = 1.7$  Hz, 1H), 7.49 (d,  $J = 8.0$  Hz, 1H), 7.10-7.15 (m, 1H), 6.91 (d,  $J = 1.0$  Hz, 1H), 5.84 (s,

1H), 4.19-4.27 (m, 4H), 2.50 (d,  $J = 1.0$  Hz, 3H), 1.27 (t,  $J = 7.1$  Hz, 6H).  $^{13}\text{C}$  NMR (100 MHz,  $\text{CDCl}_3$ ):  $\delta$  168.8, 152.9, 149.2, 139.8, 137.7, 136.7, 130.6, 128.8, 122.0, 121.5, 61.6, 52.2, 15.5, 14.1. HRMS (ESI) calcd. for  $\text{C}_{17}\text{H}_{19}\text{NO}_4\text{S}$  ( $\text{M}+\text{H}$ ) $^+$ : 334.1109, found: 334.1107.

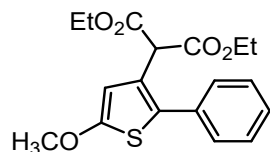

**diethyl 2-(5-methoxy-2-phenylthiophen-3-yl)malonate (3q)**

Yellow oil (48.7 mg, 70%).  $^1\text{H}$  NMR (400 MHz,  $\text{CDCl}_3$ ):  $\delta$  7.37-7.44 (m, 4H), 7.31-7.36 (m, 1H), 6.41 (s, 1H), 4.76 (s, 1H), 4.16-4.27 (m, 4H), 3.91 (s, 3H), 1.27 (t,  $J = 7.1$  Hz, 6H).  $^{13}\text{C}$  NMR (100 MHz,  $\text{CDCl}_3$ ):  $\delta$  168.0, 164.7, 133.1, 129.8, 128.7, 128.6, 127.7, 125.2, 105.1, 61.8, 59.9, 51.6, 14.0. HRMS (ESI) calcd. for  $\text{C}_{18}\text{H}_{20}\text{O}_5\text{S}$  ( $\text{M}+\text{Na}$ ) $^+$ : 371.0924, found: 371.0924.

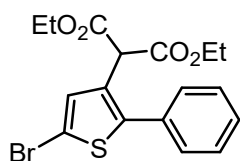

**diethyl 2-(5-bromo-2-phenylthiophen-3-yl)malonate (3r)**

Yellow solid (19.8 mg, 25%), mp. 80-81 °C.  $^1\text{H}$  NMR (400 MHz,  $\text{CDCl}_3$ ):  $\delta$  7.38-7.46 (m, 5H), 7.28 (s, 1H), 4.7 (s, 1H), 4.15-4.26 (m, 4H), 1.27 (t,  $J = 7.1$  Hz, 6H).  $^{13}\text{C}$  NMR (100 MHz,  $\text{CDCl}_3$ ):  $\delta$  167.6, 143.9, 132.1, 131.6, 129.7, 128.9, 128.7, 128.5, 111.0, 62.1, 51.2, 14.0. HRMS (ESI) calcd. for  $\text{C}_{17}\text{H}_{17}\text{BrO}_4\text{S}$  ( $\text{M}+\text{Na}$ ) $^+$ : 418.9924, found: 418.9923.

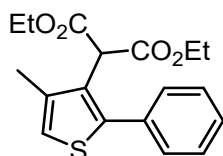

**diethyl 2-(4-methyl-2-phenylthiophen-3-yl)malonate (3s)**

Yellow oil (40.5 mg, 61%).  $^1\text{H}$  NMR (400 MHz,  $\text{CDCl}_3$ ):  $\delta$  7.55-7.60 (m, 2H), 7.32-7.37 (m, 2H), 7.22-7.28 (m, 1H), 7.04 (s, 1H), 4.93 (s, 1H), 4.20-4.32 (m, 4H), 2.24 (s, 3H), 1.30 (t,  $J = 7.1$  Hz, 6H).  $^{13}\text{C}$  NMR (100 MHz,  $\text{CDCl}_3$ ):  $\delta$  167.4, 143.5, 137.5, 134.2, 128.8, 127.5, 126.8, 125.6, 125.5, 62.2, 51.7, 14.2, 14.0. HRMS (ESI) calcd. for  $\text{C}_{18}\text{H}_{20}\text{O}_5\text{S}$  ( $\text{M}+\text{H}$ ) $^+$ : 333.1156, found: 333.1154.

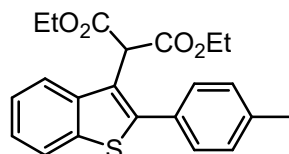

**diethyl 2-(2-(p-tolyl)benzo[b]thiophen-3-yl)malonate (3t)**

White solid (67.9 mg, 89%), mp. 119-120 °C.  $^1\text{H}$  NMR (400 MHz,  $\text{CDCl}_3$ ):  $\delta$  7.92 (dd,  $J_1 = 7.7$  Hz,  $J_2 = 0.9$  Hz, 1H), 7.79 (dd,  $J_1 = 7.2$  Hz,  $J_2 = 1.0$  Hz, 1H), 7.45 (d,  $J = 8.1$  Hz, 2H), 7.37 (td,  $J_1 = 7.1$  Hz,  $J_2 = 1.2$  Hz, 1H), 7.32 (td,  $J_1 = 7.6$  Hz,  $J_2 = 1.1$  Hz, 1H), 7.28 (d,  $J = 8.0$  Hz, 2H), 5.08 (s, 1H), 4.12-4.23 (m, 4H), 2.42 (s, 3H), 1.21 (t,  $J = 7.1$  Hz, 6H).  $^{13}\text{C}$  NMR (100 MHz,  $\text{CDCl}_3$ ):  $\delta$  167.9, 143.8, 138.9, 138.8, 130.5, 130.0, 130.0, 129.5, 124.3, 124.3, 124.0, 122.8, 122.0, 61.8, 51.5, 21.4, 14.0. HRMS (ESI) calcd. for  $\text{C}_{22}\text{H}_{22}\text{O}_4\text{S}$  ( $\text{M}+\text{Na}$ ) $^+$ : 405.1131, found: 405.1128.

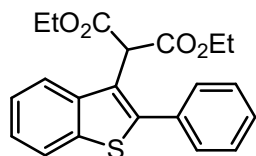

**diethyl 2-(2-phenylbenzo[*b*]thiophen-3-yl)malonate (3u)**

White solid (67.7 mg, 92%), mp. 90-91 °C. <sup>1</sup>H NMR (400 MHz, CDCl<sub>3</sub>): δ 7.93 (dd, *J*<sub>1</sub> = 7.8 Hz, *J*<sub>2</sub> = 0.9 Hz, 1H), 7.81 (dd, *J*<sub>1</sub> = 7.5 Hz, *J*<sub>2</sub> = 1.0 Hz, 1H), 7.55-7.60 (m, 2H), 7.43-7.50 (m, 3H), 7.31-7.41 (m, 2H), 5.08 (s, 1H), 4.11-4.22 (m, 4H), 2.42 (s, 3H), 1.21 (t, *J* = 7.1 Hz, 6H). <sup>13</sup>C NMR (100 MHz, CDCl<sub>3</sub>): δ 167.8, 143.6, 138.9, 138.9, 133.4, 130.1, 128.8, 128.8, 124.4, 124.3, 124.1, 123.1, 122.0, 61.9, 51.4, 14.0. HRMS (ESI) calcd. for C<sub>21</sub>H<sub>20</sub>O<sub>4</sub>S (M+Na)<sup>+</sup>: 391.0975, found: 391.0972.

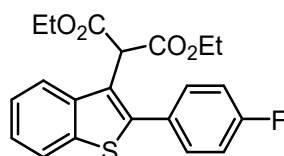

**diethyl 2-(2-(4-fluorophenyl)benzo[*b*]thiophen-3-yl)malonate (3v)**

White solid (61.0 mg, 79%), mp. 82-83 °C. <sup>1</sup>H NMR (400 MHz, CDCl<sub>3</sub>): δ 7.92 (dd, *J*<sub>1</sub> = 7.5 Hz, *J*<sub>2</sub> = 1.1 Hz, 1H), 7.81 (dd, *J*<sub>1</sub> = 7.3 Hz, *J*<sub>2</sub> = 1.5 Hz, 1H), 7.53-7.58 (m, 2H), 7.33-7.41 (m, 2H), 7.13-7.19 (m, 2H), 5.02 (s, 1H), 4.12-4.23 (m, 4H), 1.22 (t, *J* = 7.1 Hz, 6H). <sup>13</sup>C NMR (100 MHz, CDCl<sub>3</sub>): δ 167.7, 163.1 (*J* = 249.4 Hz), 142.3, 138.7 (*J* = 3.7 Hz), 132.0, 131.9, 129.4 (*J* = 2.9 Hz), 124.6, 124.4, 124.0, 123.4, 122.0, 115.8 (*J* = 22.0 Hz), 61.9, 51.4, 14.0. <sup>19</sup>F NMR (376.5 MHz, CDCl<sub>3</sub>): δ -112.4. HRMS (ESI) calcd. for C<sub>22</sub>H<sub>22</sub>O<sub>5</sub>S (M+H)<sup>+</sup>: 387.1061, found: 387.1056.

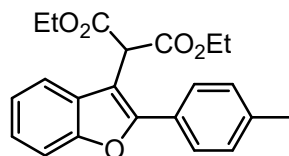

**diethyl 2-(2-(*p*-tolyl)benzofuran-3-yl)malonate (3w)**

White solid (60.0 mg, 79%), mp. 79-80 °C. <sup>1</sup>H NMR (400 MHz, CDCl<sub>3</sub>): δ 7.72 (dd, *J*<sub>1</sub> = 7.5 Hz, *J*<sub>2</sub> = 1.5 Hz, 1H), 7.67 (d, *J* = 7.2 Hz, 2H), 7.49 (d, *J* = 7.7 Hz, 1H), 7.32 (d, *J* = 8.3 Hz, 2H), 7.20-7.30 (m, 2H), 5.06 (s, 1H), 4.23 (q, *J* = 7.1 Hz, 4H), 2.42 (s, 3H), 1.24 (t, *J* = 7.1 Hz, 6H). <sup>13</sup>C NMR (100 MHz, CDCl<sub>3</sub>): δ 167.7, 154.4, 154.2, 139.4, 129.6, 128.2, 128.1, 127.1, 124.4, 122.7, 121.9, 111.1, 107.9, 62.0, 49.9, 21.4, 14.0. HRMS (ESI) calcd. for C<sub>22</sub>H<sub>22</sub>O<sub>5</sub> (M+Na)<sup>+</sup>: 389.1360, found: 389.1360.

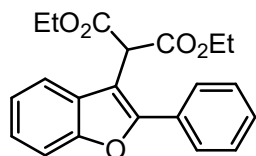

**diethyl 2-(2-phenylbenzofuran-3-yl)malonate (3x)**

White solid (61.2 mg, 87%), mp. 79-80 °C. <sup>1</sup>H NMR (400 MHz, CDCl<sub>3</sub>): δ 7.76-7.81 (m, 2H), 7.71-7.75 (m, 1H), 7.49-7.54 (m, 3H), 7.43-7.48 (m, 1H), 7.31 (td, *J*<sub>1</sub> = 7.2 Hz, *J*<sub>2</sub> = 1.3 Hz, 1H), 7.23-7.28 (m, 1H), 5.08 (s, 1H), 4.23 (q, *J* = 7.1 Hz, 4H), 1.25 (t, *J* = 7.2 Hz, 6H). <sup>13</sup>C NMR (100 MHz, CDCl<sub>3</sub>): δ 167.7, 154.3, 154.1, 129.8, 129.3, 128.9, 128.2, 128.1, 124.6, 122.8, 122.0, 111.2, 108.4, 62.0, 49.4, 14.0. HRMS (ESI) calcd. for C<sub>21</sub>H<sub>20</sub>O<sub>5</sub> (M+ Na)<sup>+</sup>:



375.1203, found: 375.1198.

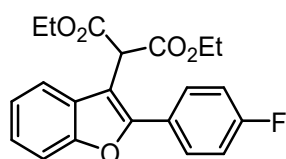

**diethyl 2-(2-(4-fluorophenyl)benzofuran-3-yl)malonate (3y)**

White solid (60.7 mg, 82%), mp. 86-87 °C. <sup>1</sup>H NMR (400 MHz, CDCl<sub>3</sub>): δ 7.78 (td, *J*<sub>1</sub> = 5.4 Hz, *J*<sub>2</sub> = 2.2 Hz, 2H), 7.72 (d, *J* = 7.8 Hz, 1H), 7.50 (d, *J* = 7.8 Hz, 1H), 7.31 (td, *J*<sub>1</sub> = 7.2 Hz, *J*<sub>2</sub> = 1.3 Hz, 1H), 7.18-7.29 (m, 3H), 4.99 (s, 1H), 4.23 (q, *J* = 7.2 Hz, 4H), 1.25 (t, *J* = 7.1 Hz, 6H). <sup>13</sup>C NMR (100 MHz, CDCl<sub>3</sub>): δ 167.6, 163.3 (*J* = 250.2 Hz), 154.2, 153.2, 132.0 (*J* = 8.8 Hz), 128.0, 126.1 (*J* = 3.7 Hz), 124.7, 122.9, 121.9, 116.2, 115.9, 111.1, 108.4, 62.1, 49.4, 14.0. <sup>19</sup>F NMR (376.5 MHz, CDCl<sub>3</sub>): δ -111.1. HRMS (ESI) calcd. for C<sub>21</sub>H<sub>19</sub>FO<sub>5</sub> (M+Na)<sup>+</sup>: 393.1109, found: 393.1109.

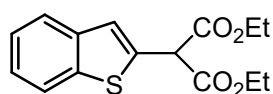

**diethyl 2-(benzo[b]thiophen-2-yl)malonate (3z)**

Yellow oil (23.4 mg, 40%). <sup>1</sup>H NMR (400 MHz, CDCl<sub>3</sub>): δ 7.78-7.83 (m, 1H), 7.72-7.76 (m, 1H), 7.36 (s, 1H), 7.30-7.35 (m, 2H), 4.96 (s, 1H), 4.20-4.32 (m, 4H), 1.30 (t, *J* = 7.1 Hz, 6H). <sup>13</sup>C NMR (100 MHz, CDCl<sub>3</sub>): δ 167.0, 140.3, 139.0, 134.4, 124.8, 124.5, 124.3, 123.7, 122.1, 62.4, 53.9, 14.0. HRMS (ESI) calcd. for C<sub>15</sub>H<sub>14</sub>O<sub>4</sub>S (M+H)<sup>+</sup>: 293.0843, found: 293.0841.

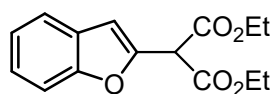

**diethyl 2-(benzofuran-2-yl)malonate (3aa)**

Yellow oil (26.5 mg, 48%). <sup>1</sup>H NMR (400 MHz, CDCl<sub>3</sub>): δ 7.56 (dd, *J*<sub>1</sub> = 7.5 Hz, *J*<sub>2</sub> = 0.9 Hz, 1H), 7.47 (dd, *J*<sub>1</sub> = 8.0 Hz, *J*<sub>2</sub> = 0.7 Hz, 1H), 7.28 (td, *J*<sub>1</sub> = 7.2 Hz, *J*<sub>2</sub> = 1.4 Hz, 1H), 7.22 (td, *J*<sub>1</sub> = 7.6 Hz, *J*<sub>2</sub> = 1.1 Hz, 1H), 6.85 (s, 1H), 4.90 (s, 1H), 4.24-4.32 (m, 4H), 1.30 (t, *J* = 7.1 Hz, 6H). <sup>13</sup>C NMR (100 MHz, CDCl<sub>3</sub>): δ 165.9, 154.9, 148.8, 128.1, 124.5, 122.9, 121.2, 111.3, 106.3, 62.4, 52.6, 14.0. HRMS (ESI) calcd. for C<sub>15</sub>H<sub>16</sub>O<sub>5</sub> (M+Na)<sup>+</sup>: 299.0890, found: 299.0886.

## 6. References

- (1) (a) J. Song, F. Wei, Wei Sun, X. Cao, C. Liu, L. Xie and W. Huang, *Org. Chem. Front.*, 2014, **1**, 817-820; (b) Y. Li, J. Wang, M. Huang, Z. Wang, Y. Wu and Y. Wu, *J. Org. Chem.*, 2014, **79**, 2890-2897; (c) P. Tosatti and A. Pfaltz, *Angew. Chem. Int. Ed.*, 2017, **56**, 4579-4582; (d) N. Ortega, S. Urban, B. Beiring and F. Glorius, *Angew. Chem. Int. Ed.*, 2012, **51**, 1710-1713.

## 7. $^1\text{H}$ , $^{13}\text{C}$ and $^{19}\text{F}$ NMR spectra

3a.esp  
3a.esp

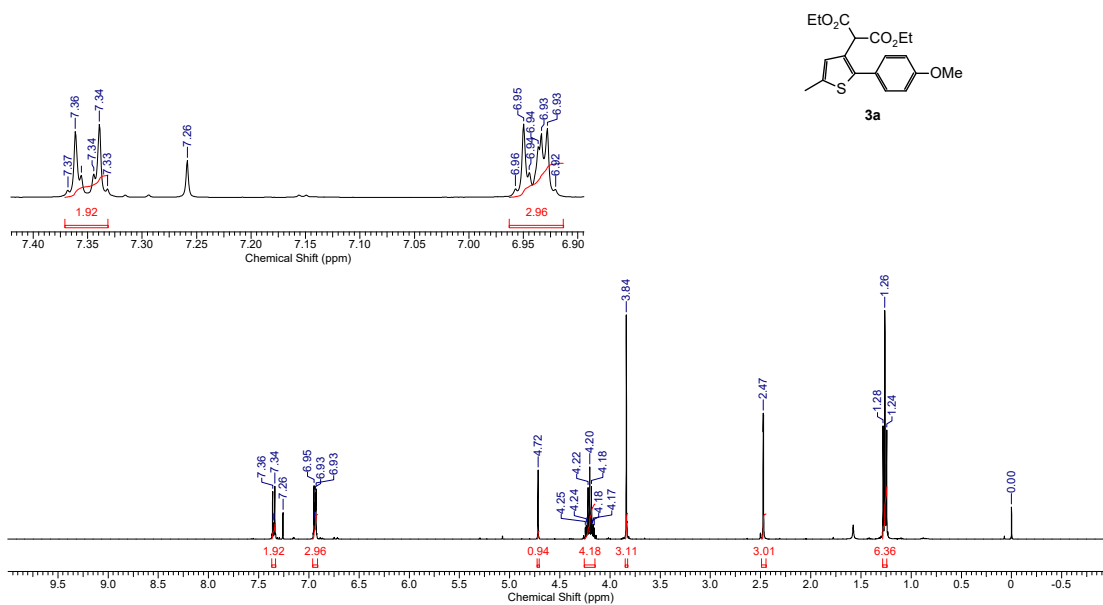

Figure S12.  $^1\text{H}$  NMR spectrum of compound 3a

tjz-1a\_9391001r  
tjz-1a\_9391001r

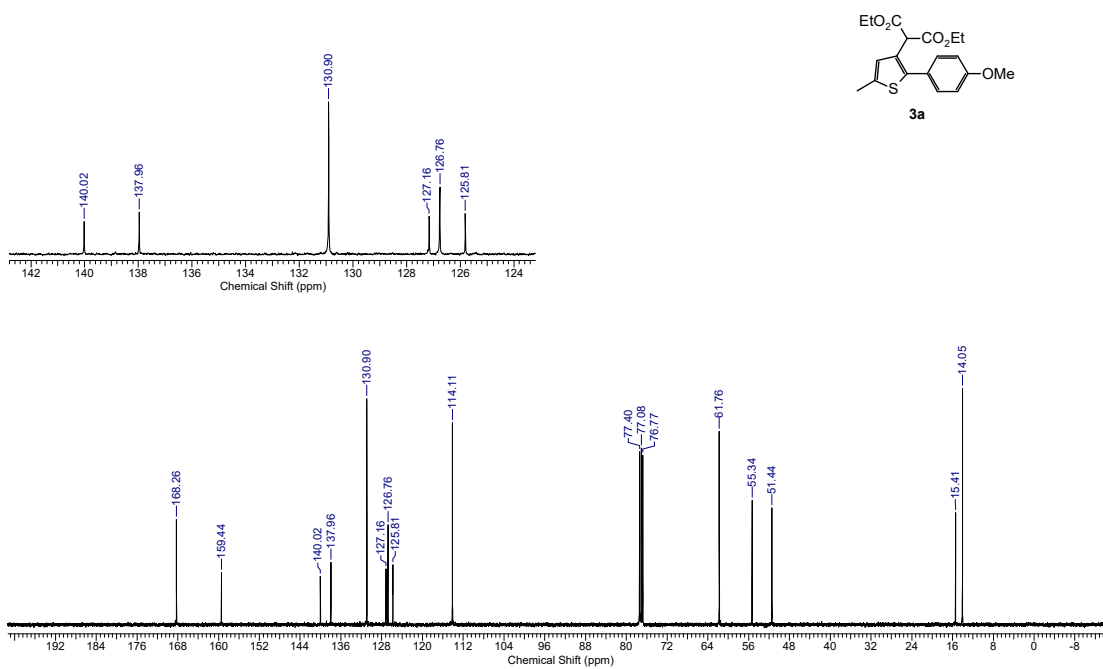

Figure S13.  $^{13}\text{C}$  NMR spectrum of compound 3a

3B.ESP  
3B.ESP

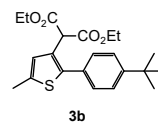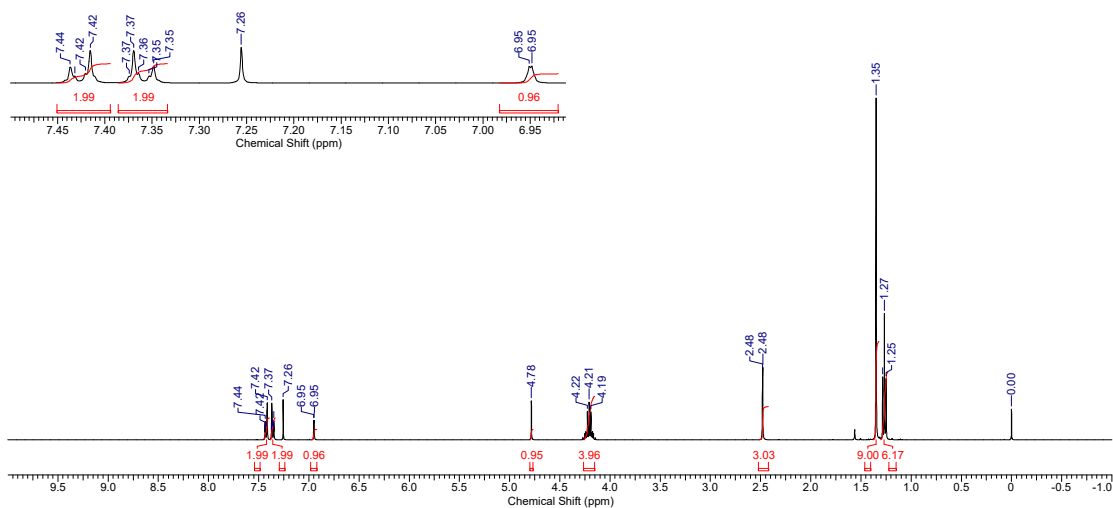

Figure S14. <sup>1</sup>H NMR spectrum of compound **3b**

3b 13C.esp  
3b 13C.esp

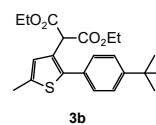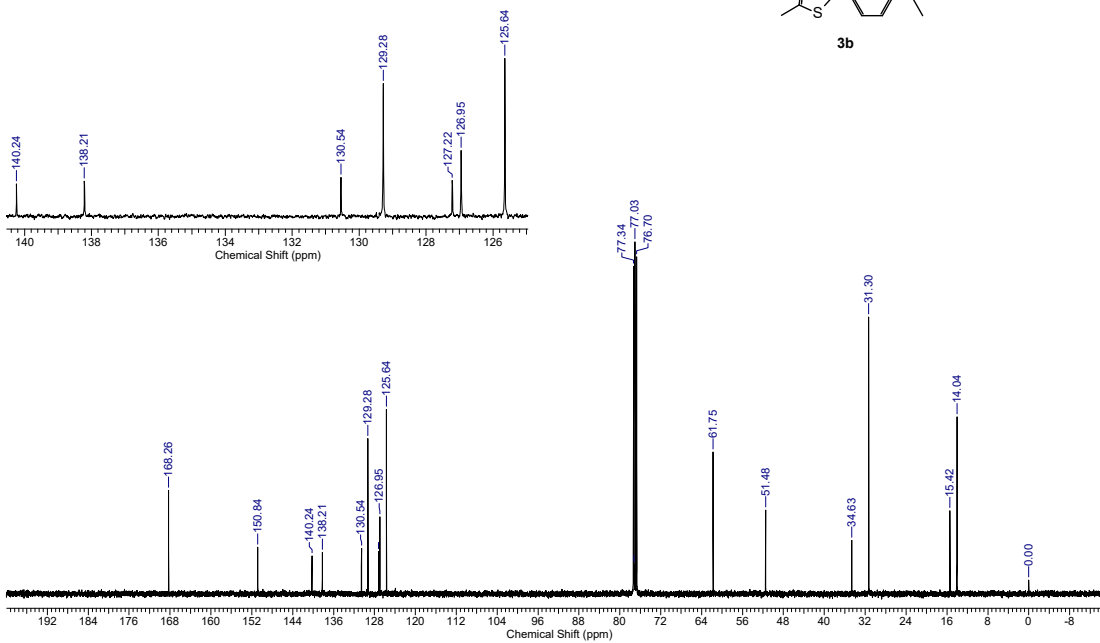

Figure S15. <sup>13</sup>C NMR spectrum of compound **3b**

3c.esp  
3c.esp

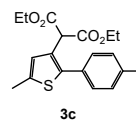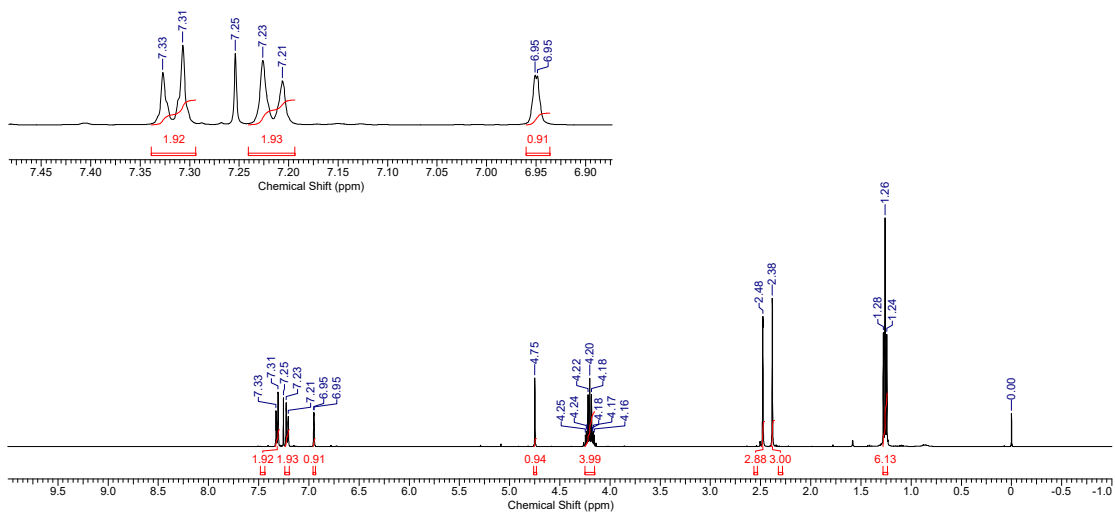

Figure 16. <sup>1</sup>H NMR spectrum of compound 3c

3c 13C.esp  
3c 13C.esp

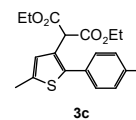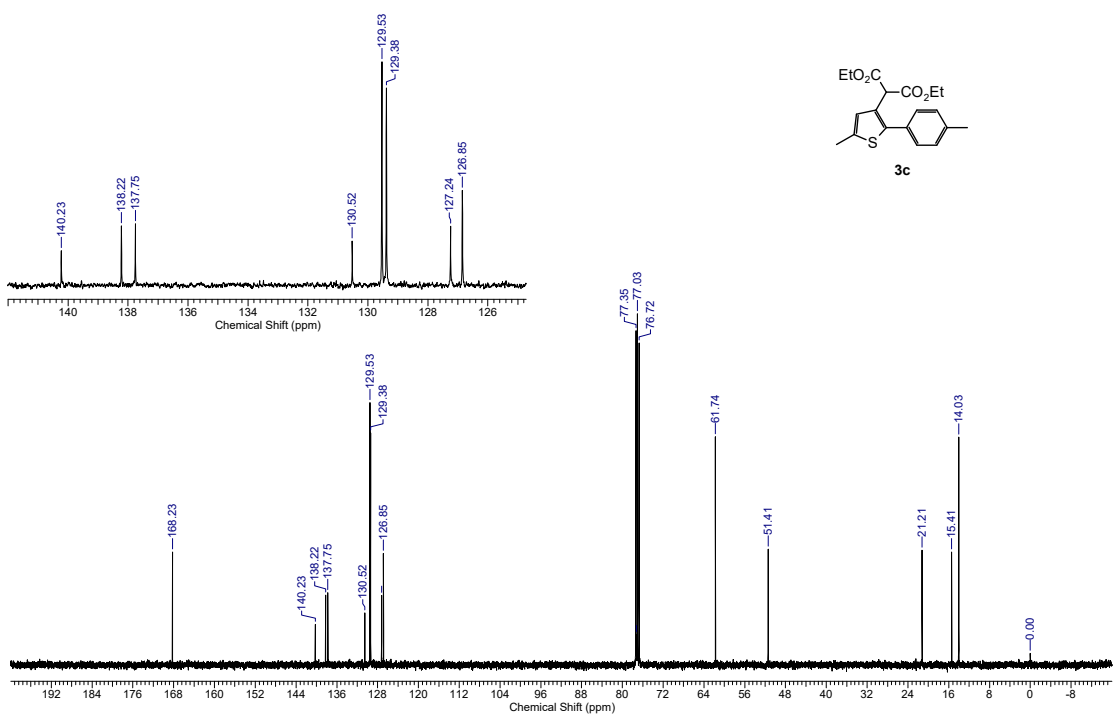

Figure S17. <sup>13</sup>C NMR spectrum of compound 3c

3d.esp  
3d.esp

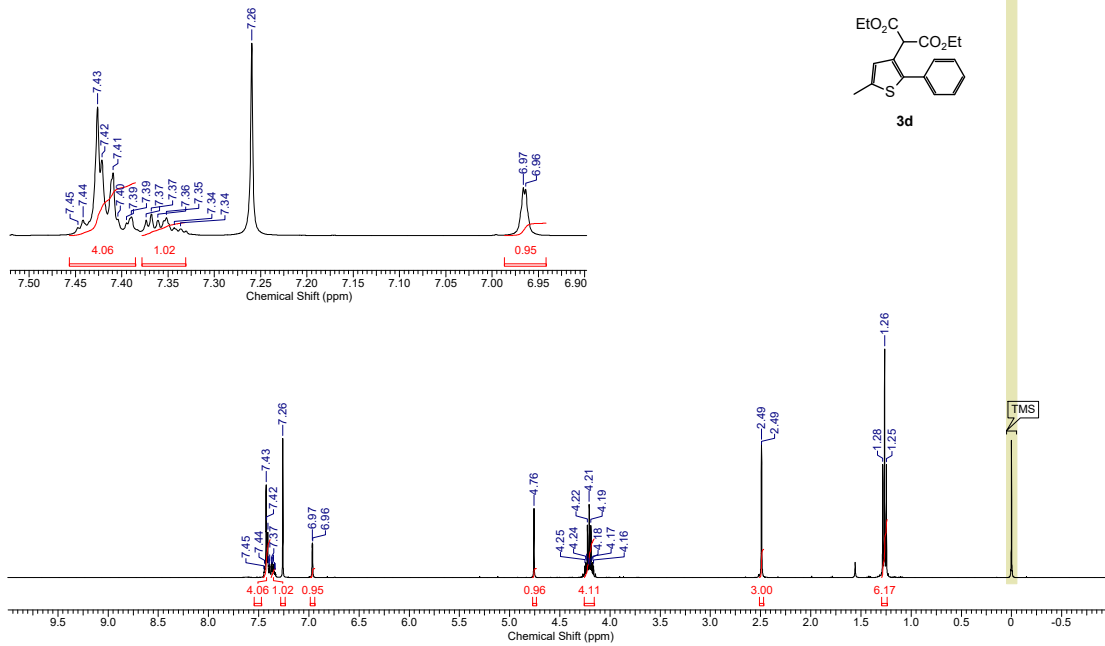

Figure S18. <sup>1</sup>H NMR spectrum of compound 3d

3D 13C.ESP  
3D 13C.ESP

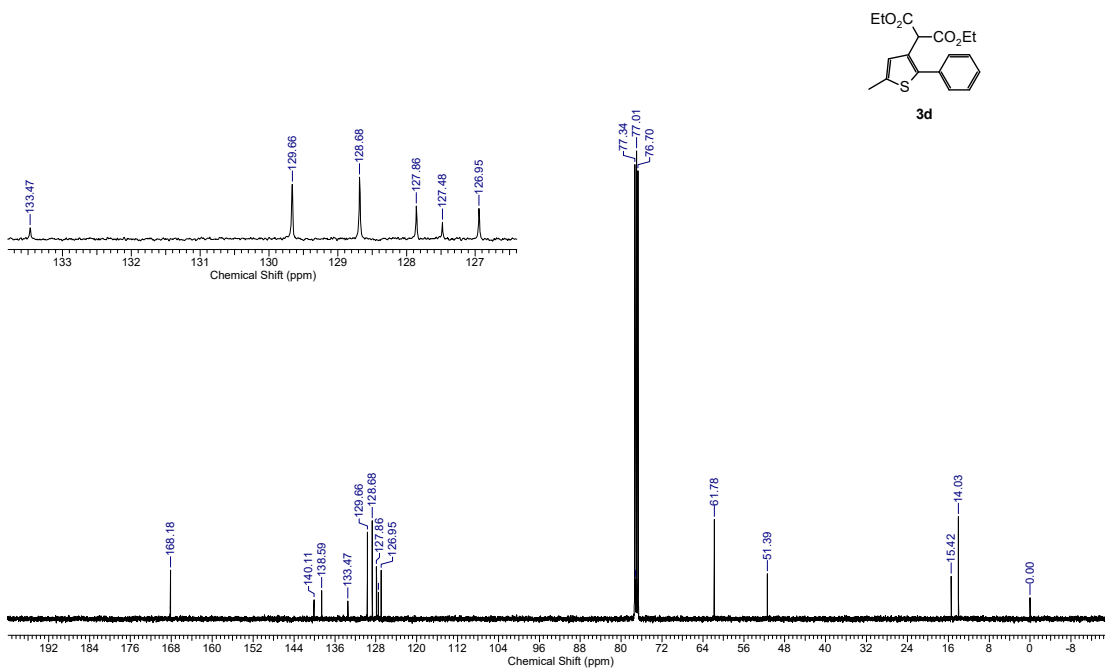

Figure S19. <sup>13</sup>C NMR spectrum of compound 3d

3e.esp  
3e.esp

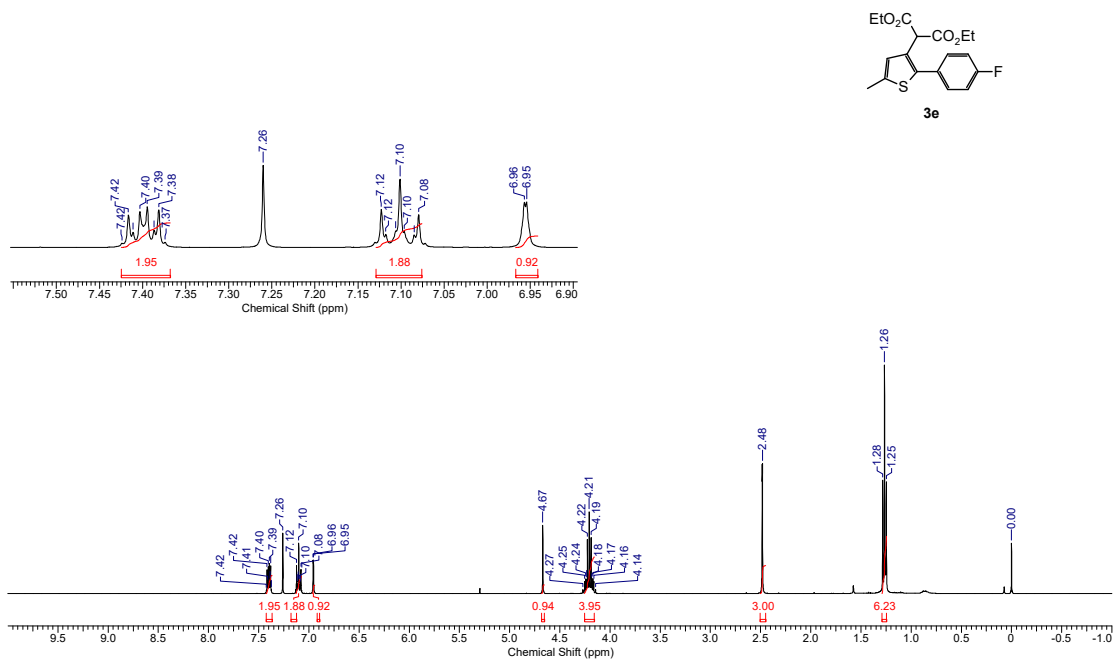

3E 18F.ESP

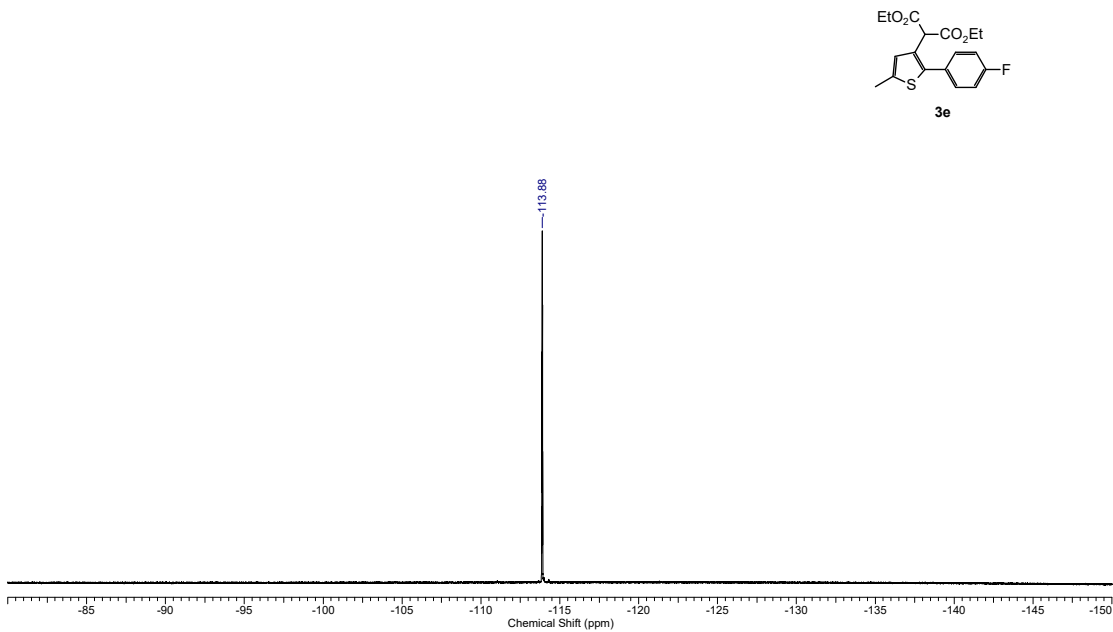

3E 13C.ESP  
3E 13C.ESP

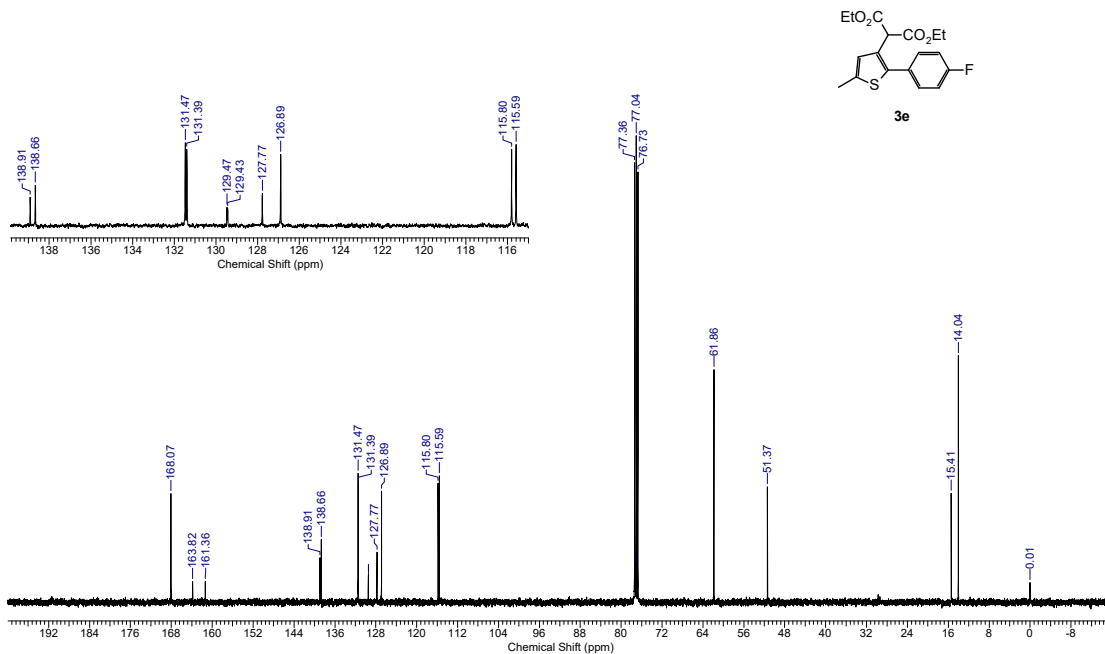

Figure S22. <sup>13</sup>C NMR spectrum of compound **3e**

3f.esp  
3f.esp

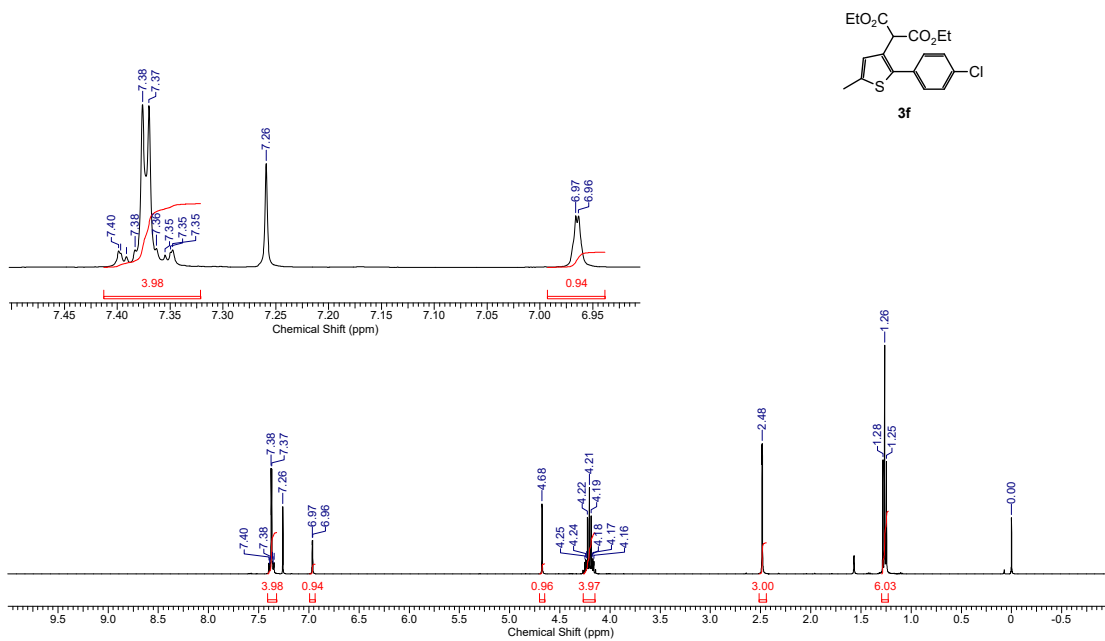

Figure S23. <sup>1</sup>H NMR spectrum of compound **3f**



3F 13C.ESP  
3F 13C.ESP

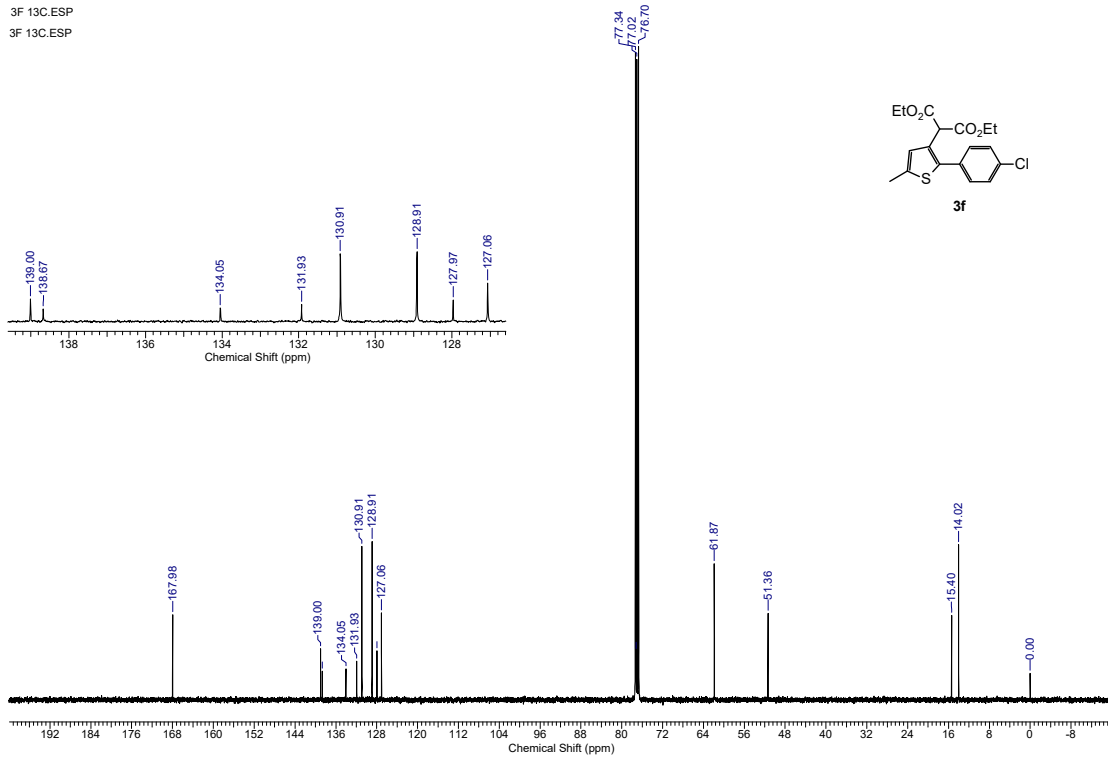

Figure S24. <sup>13</sup>C NMR spectrum of compound **3f**

3g.esp  
3g.esp

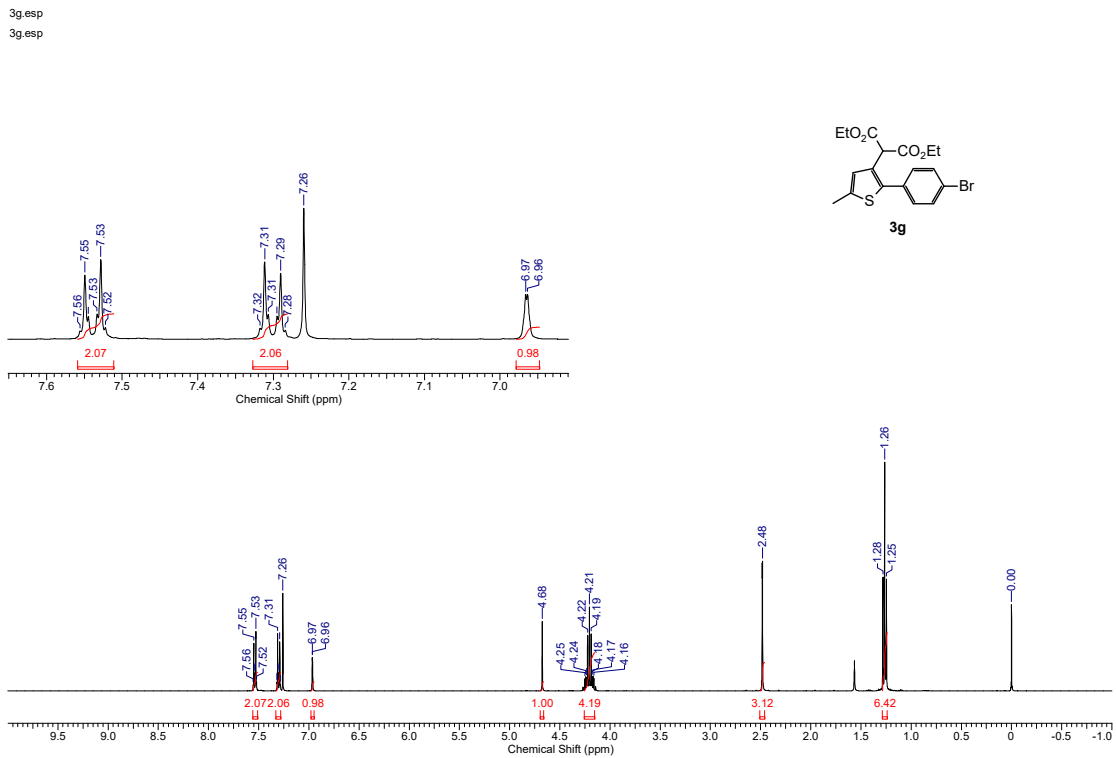

Figure S25. <sup>1</sup>H NMR spectrum of compound **3g**

3G 13C.ESP  
3G 13C.ESP

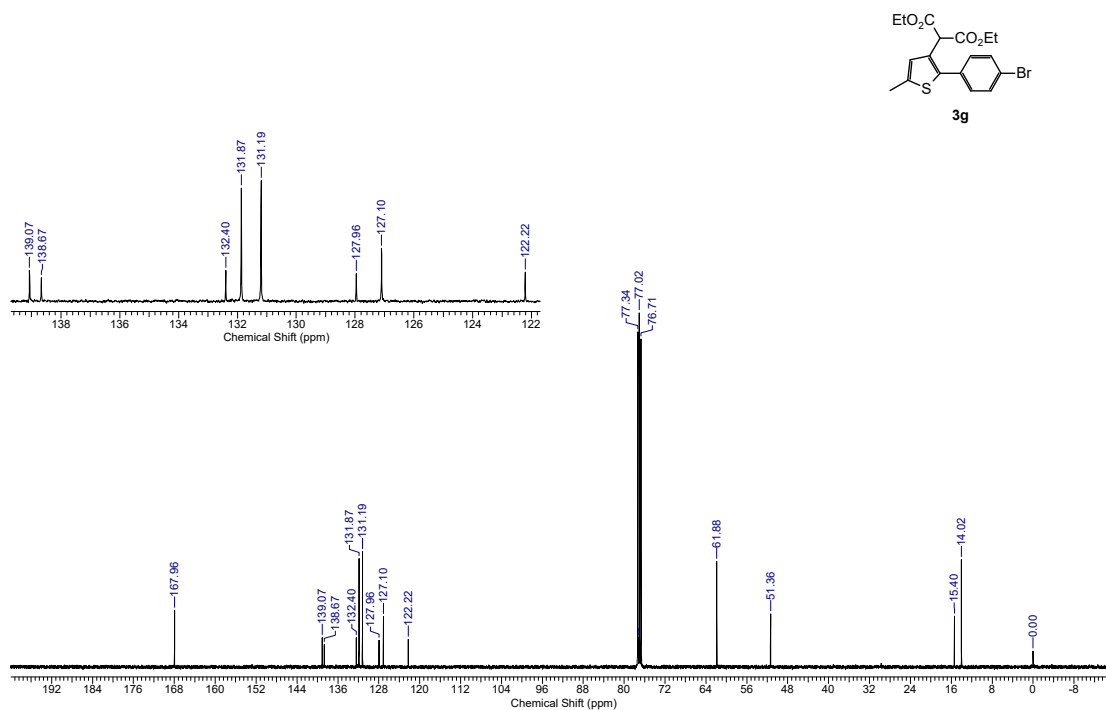

Figure S26. <sup>13</sup>C NMR spectrum of compound **3g**

3h.esp  
3h.esp

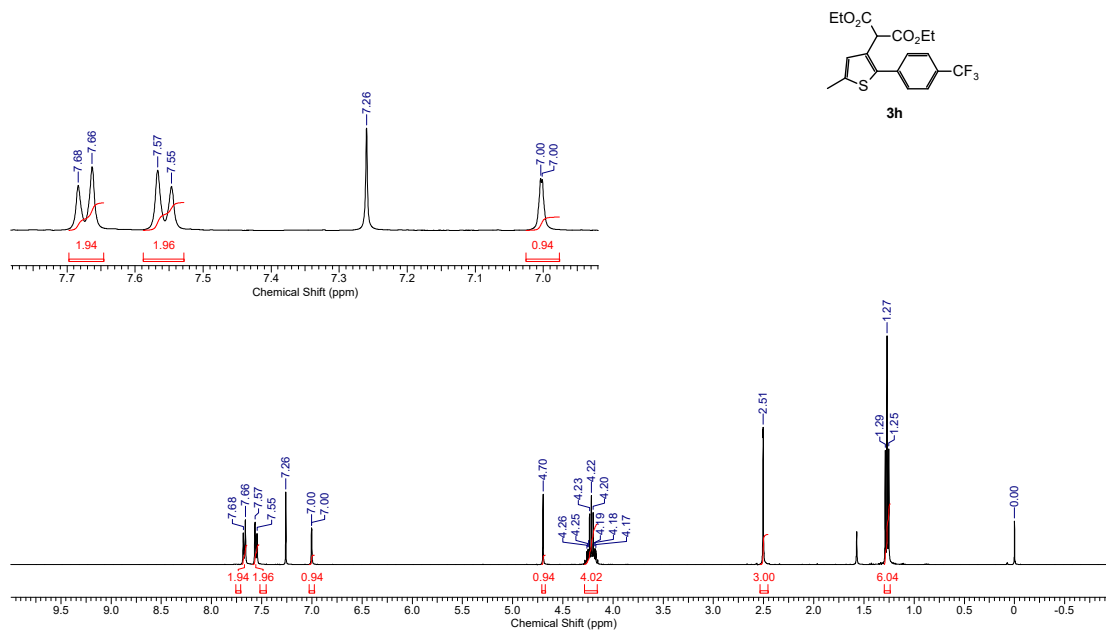

Figure S27. <sup>1</sup>H NMR spectrum of compound **3h**

3H 13C.ESP  
3H 13C.ESP

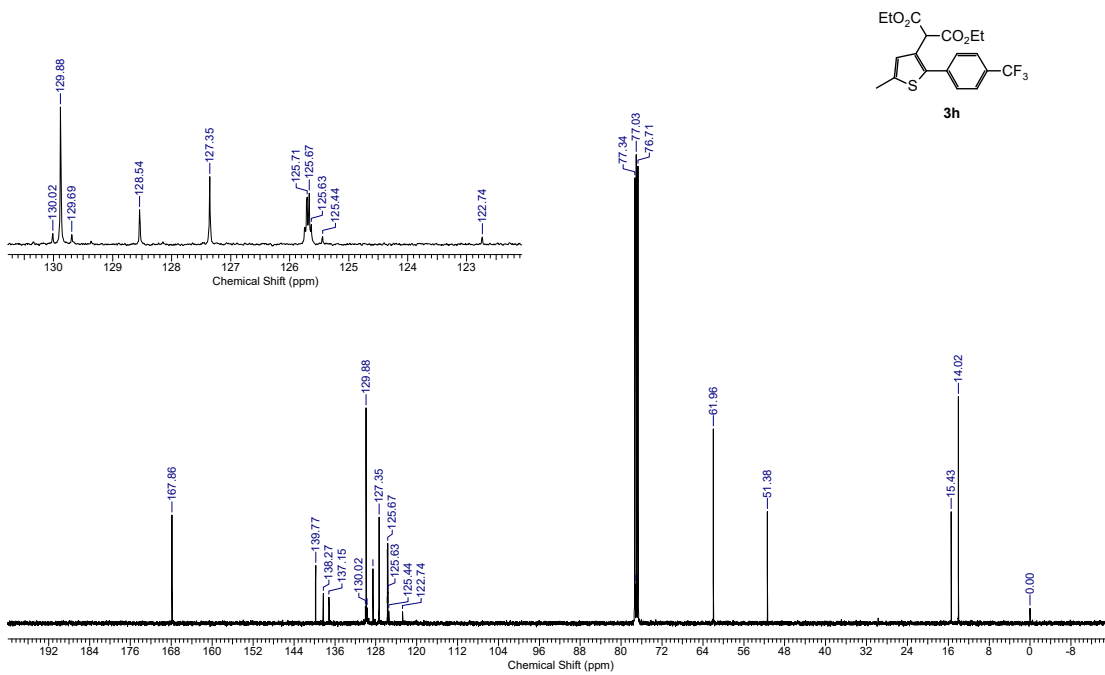

Figure S28. <sup>13</sup>C NMR spectrum of compound **3h**

3H 19F.ESP

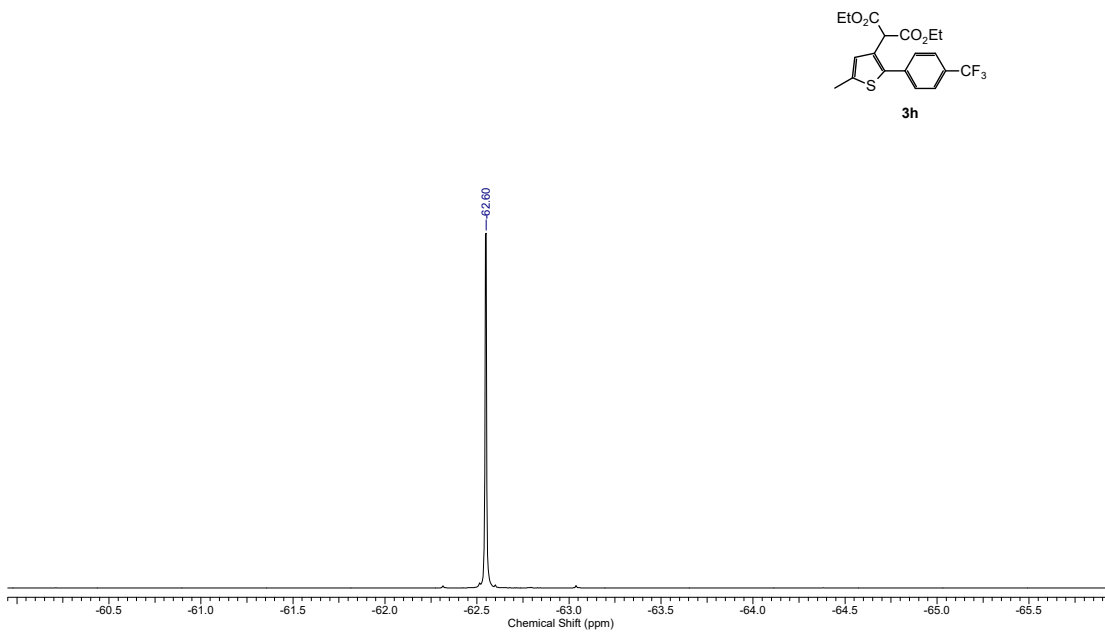

Figure S29. <sup>19</sup>F NMR spectrum of compound **3h**

3i.ESP  
3i.ESP

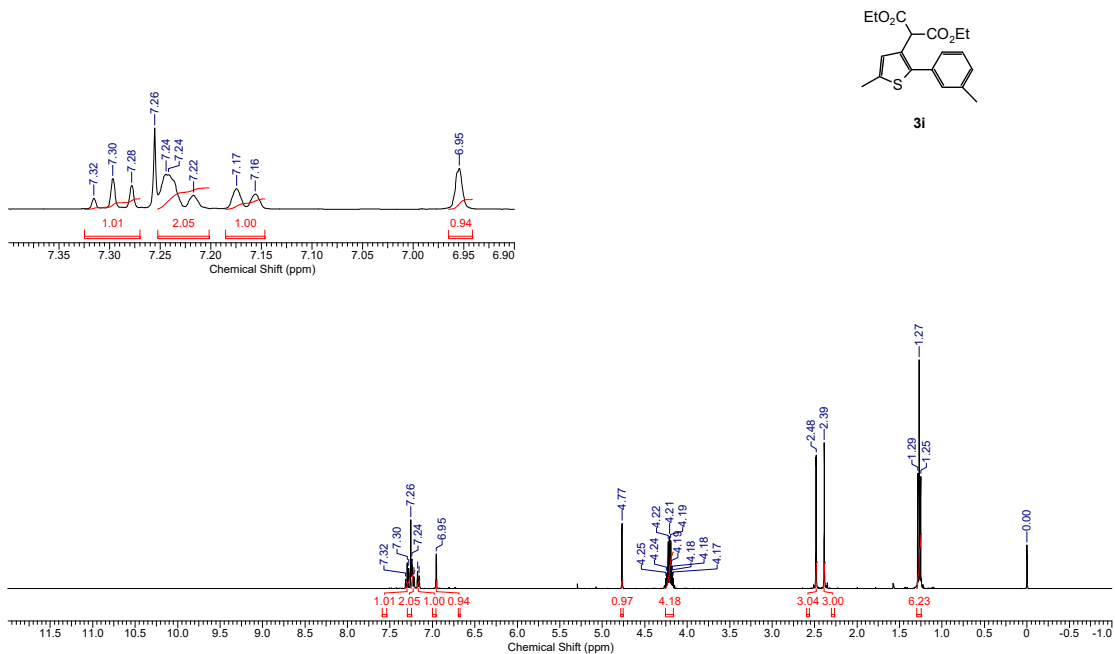

Figure S30. <sup>1</sup>H NMR spectrum of compound 3i

3i 13C.ESP  
3i 13C.ESP

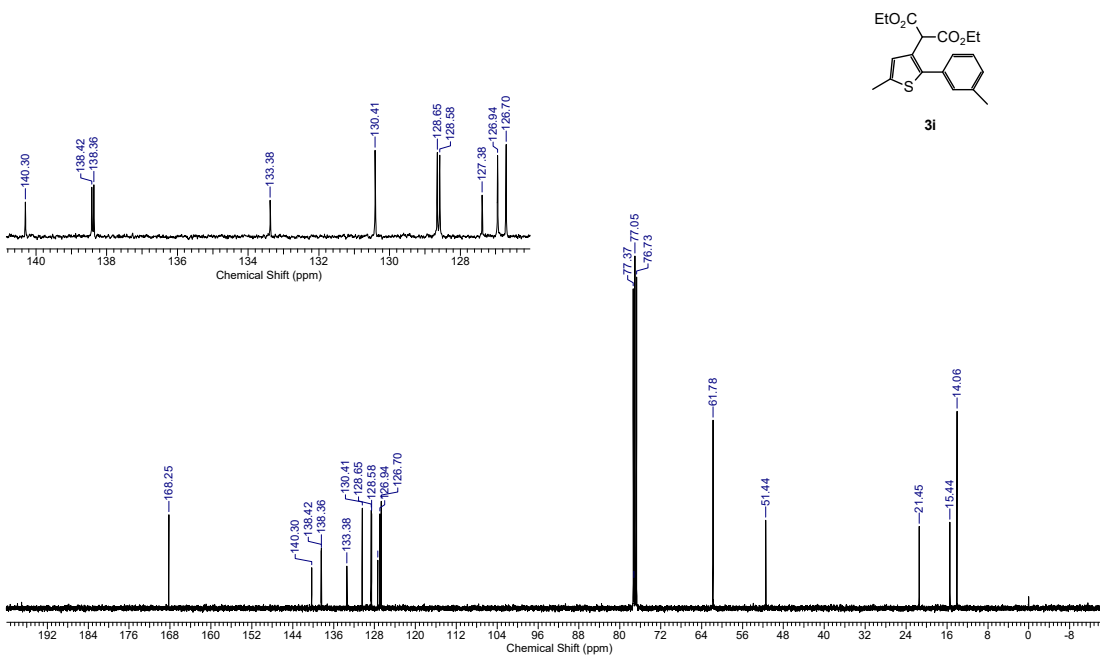

Figure S31. <sup>13</sup>C NMR spectrum of compound 3i

3J.ESP

3J.ESP

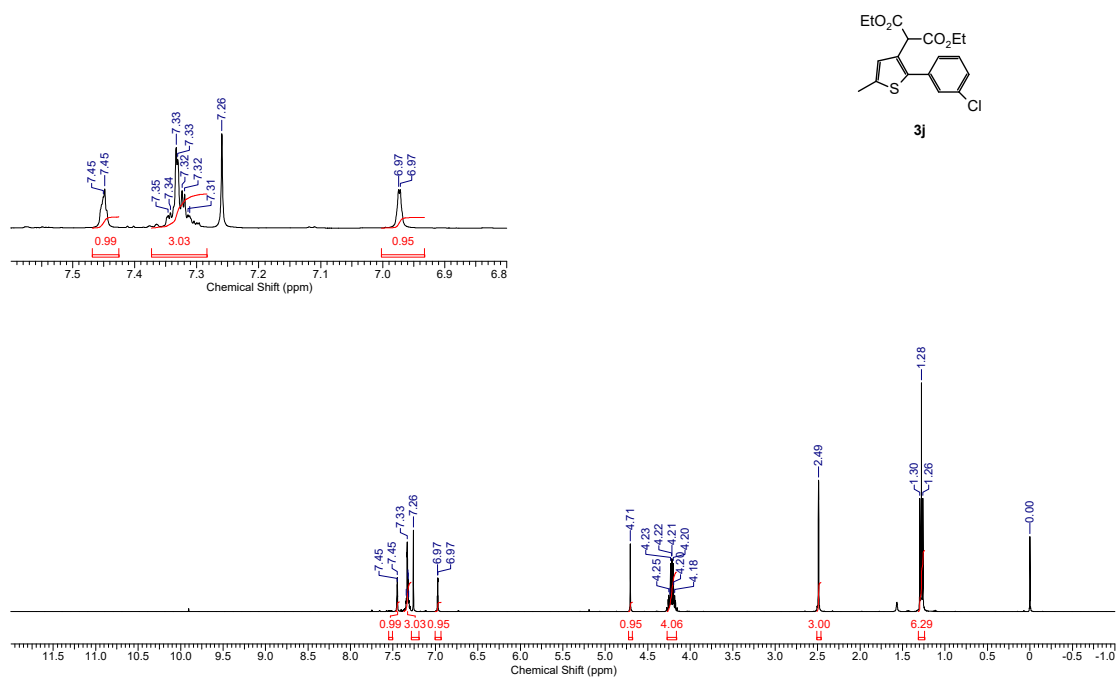

Figure S32. <sup>1</sup>H NMR spectrum of compound 3j

3J 13C.ESP

3J 13C.ESP

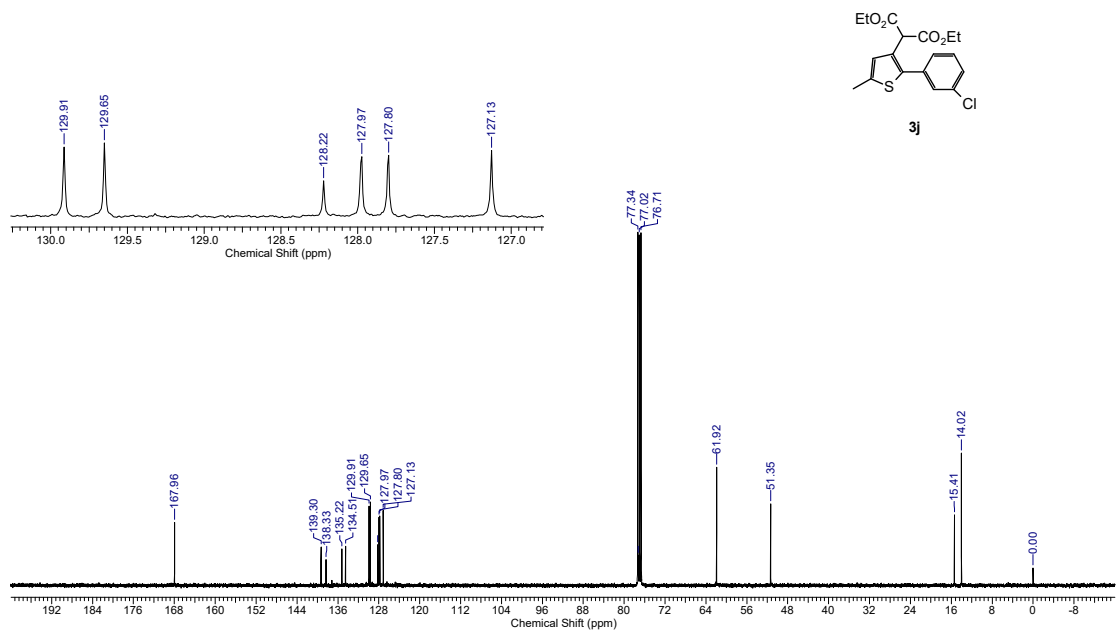

Figure S33. <sup>13</sup>C NMR spectrum of compound 3j

3K.ESP  
3K.ESP

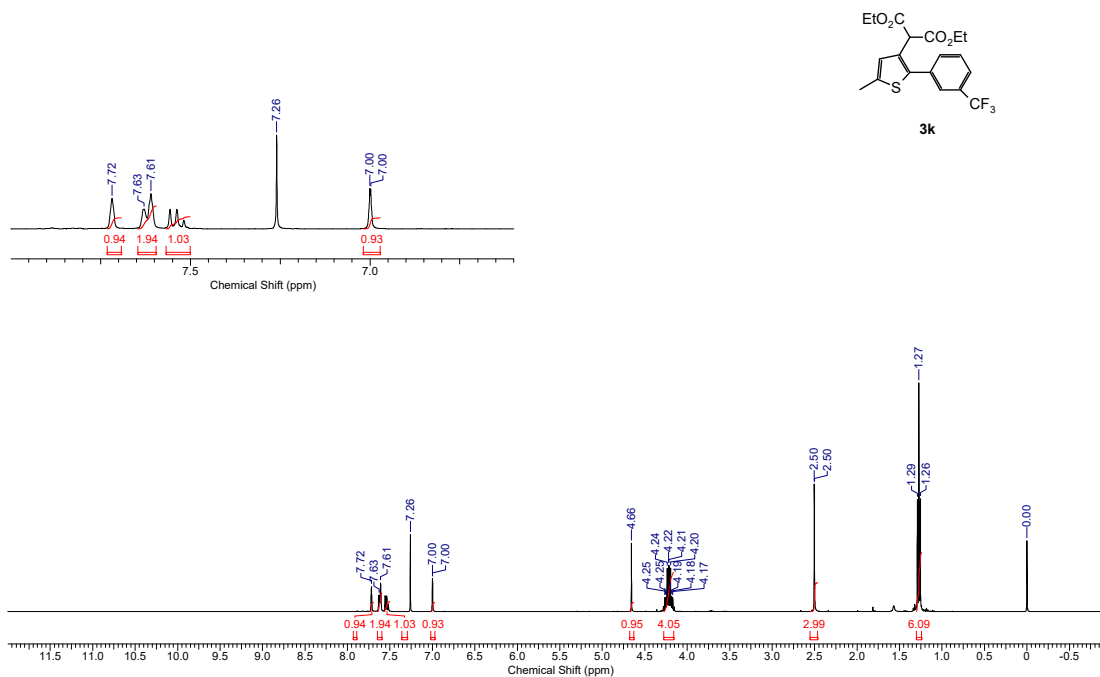

Figure S34. <sup>1</sup>H NMR spectrum of compound 3k

3K 13C.ESP  
3K 13C.ESP

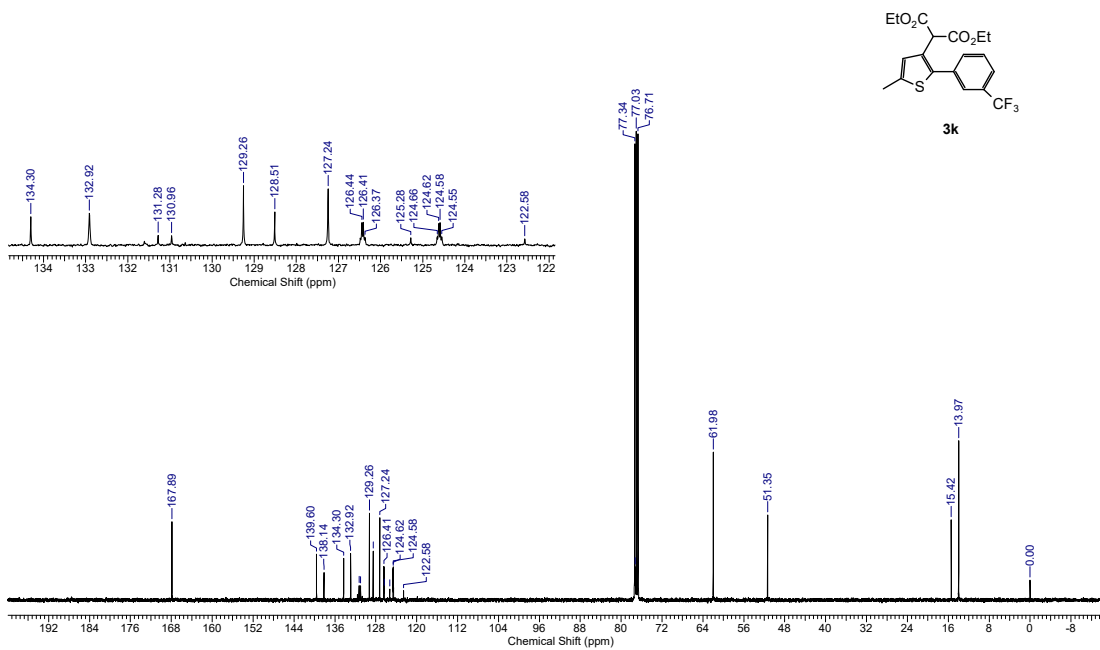

Figure S35. <sup>13</sup>C NMR spectrum of compound 3k

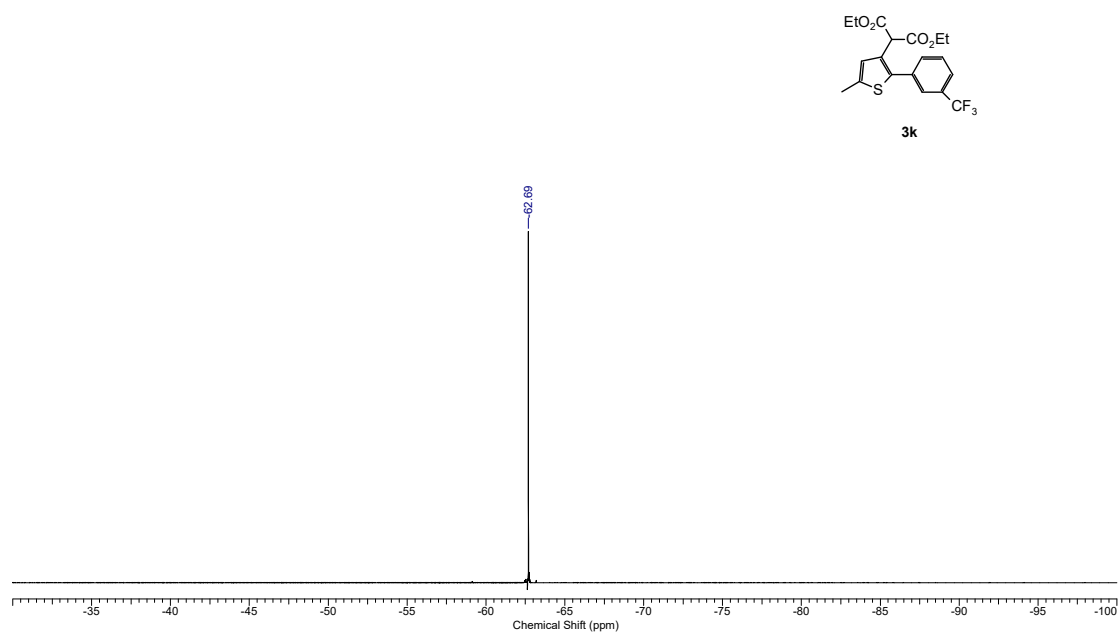3L.ESP  
3L.ESP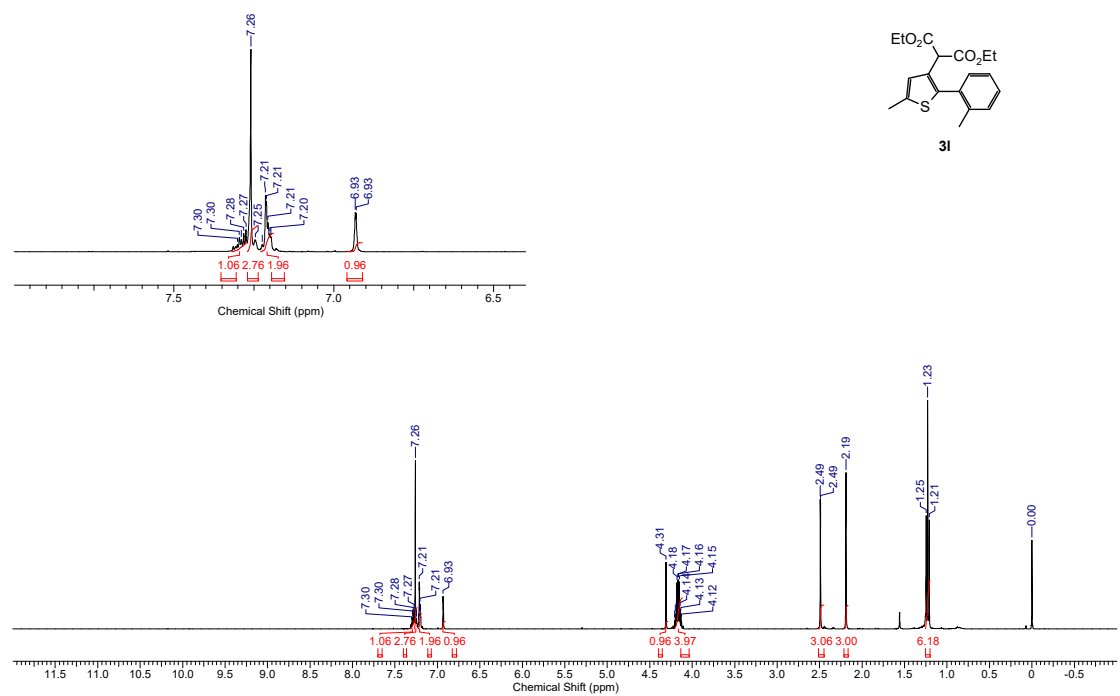

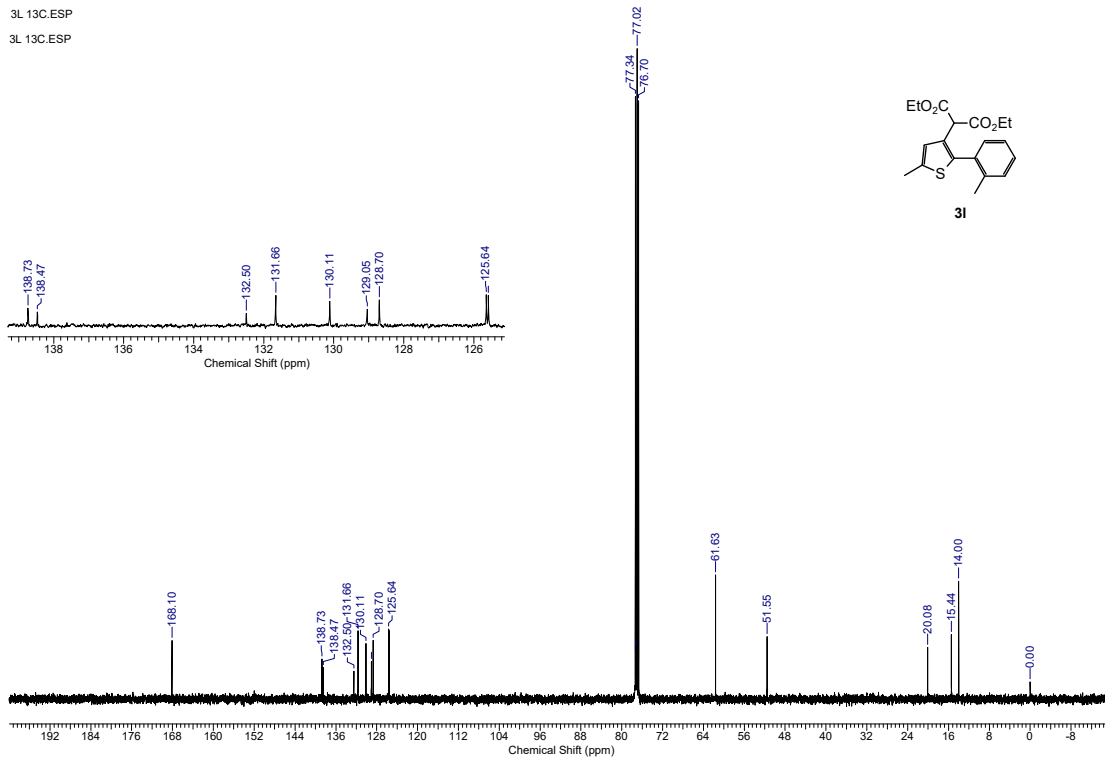

Figure S38. <sup>13</sup>C NMR spectrum of compound **3l**

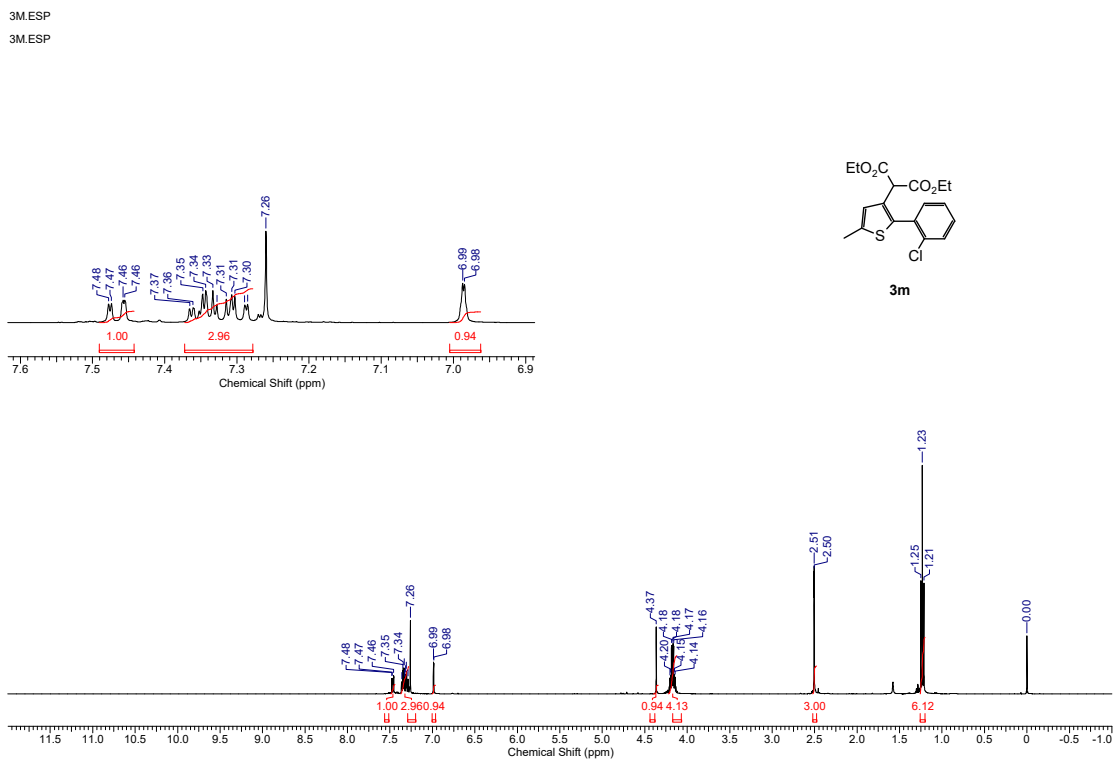

Figure S39. <sup>1</sup>H NMR spectrum of compound **3m**





3N 13C.ESP  
3N 13C.ESP

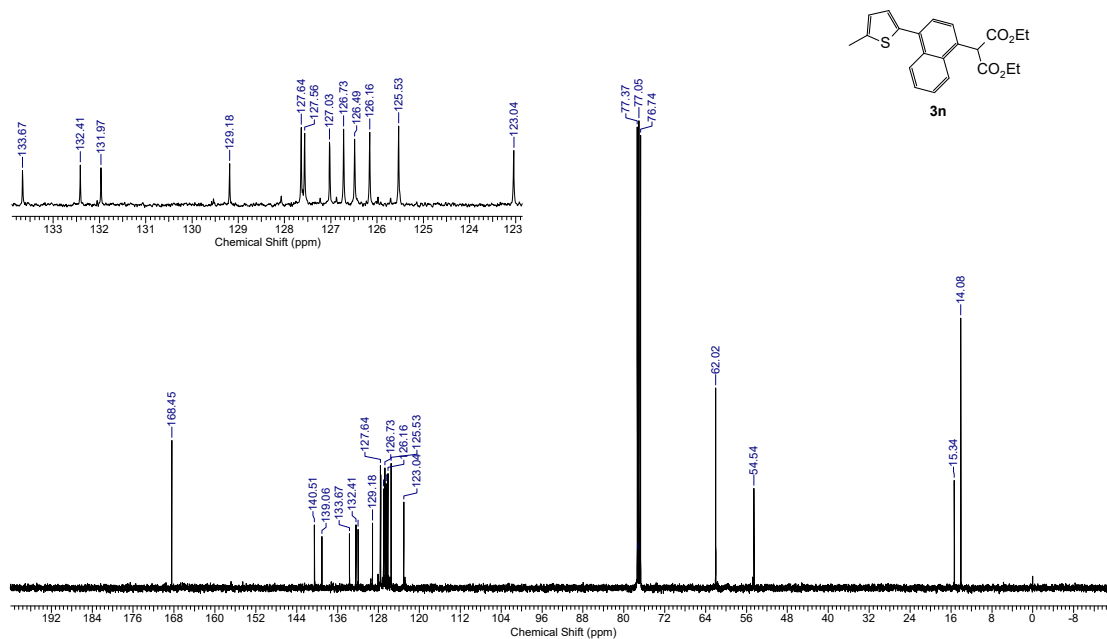

Figure S42. <sup>13</sup>C NMR spectrum of compound 3n

3O.ESP  
3O.ESP

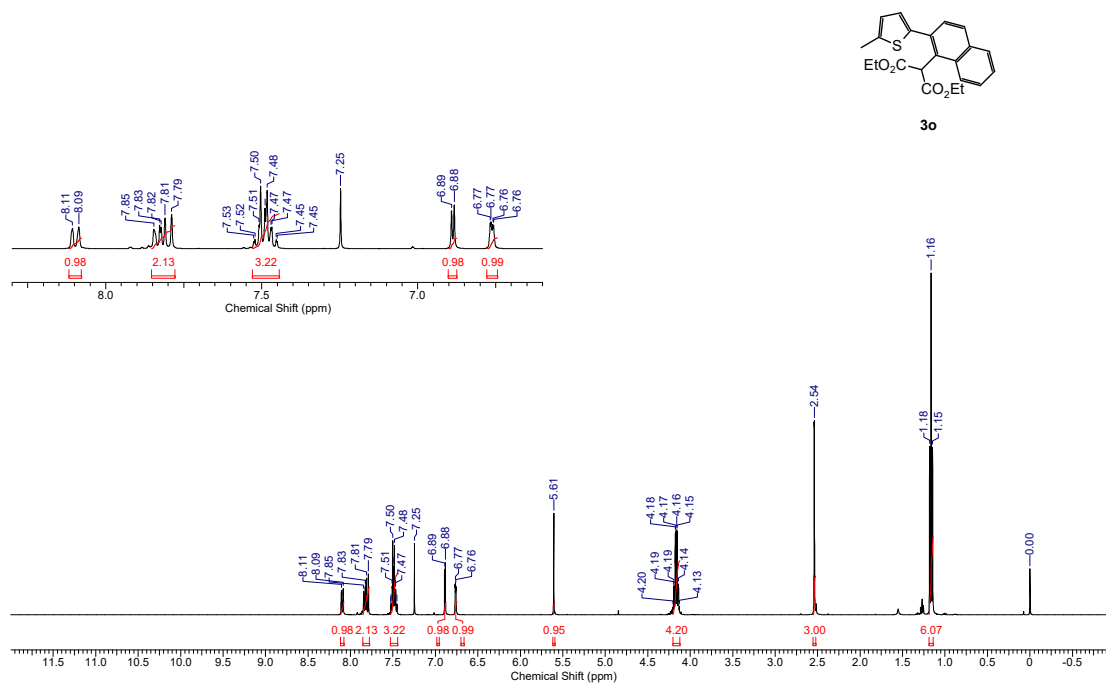

Figure S43. <sup>1</sup>H NMR spectrum of compound 3o

3O 13C.ESP  
3O 13C.ESP

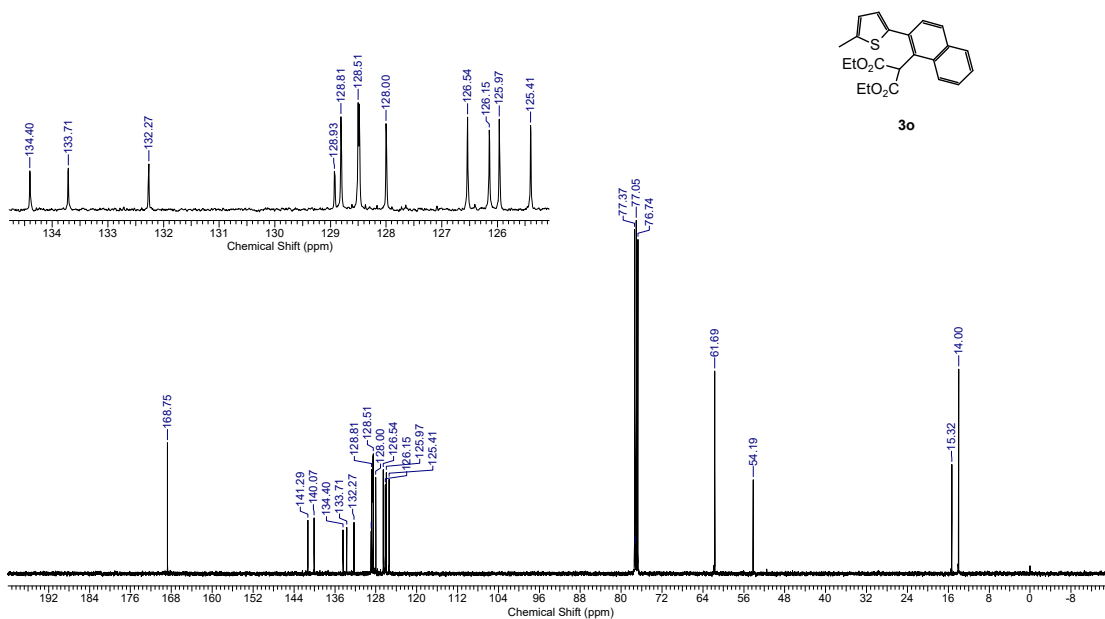

Figure S44. <sup>13</sup>C NMR spectrum of compound 3o

3P.ESP  
3P.ESP

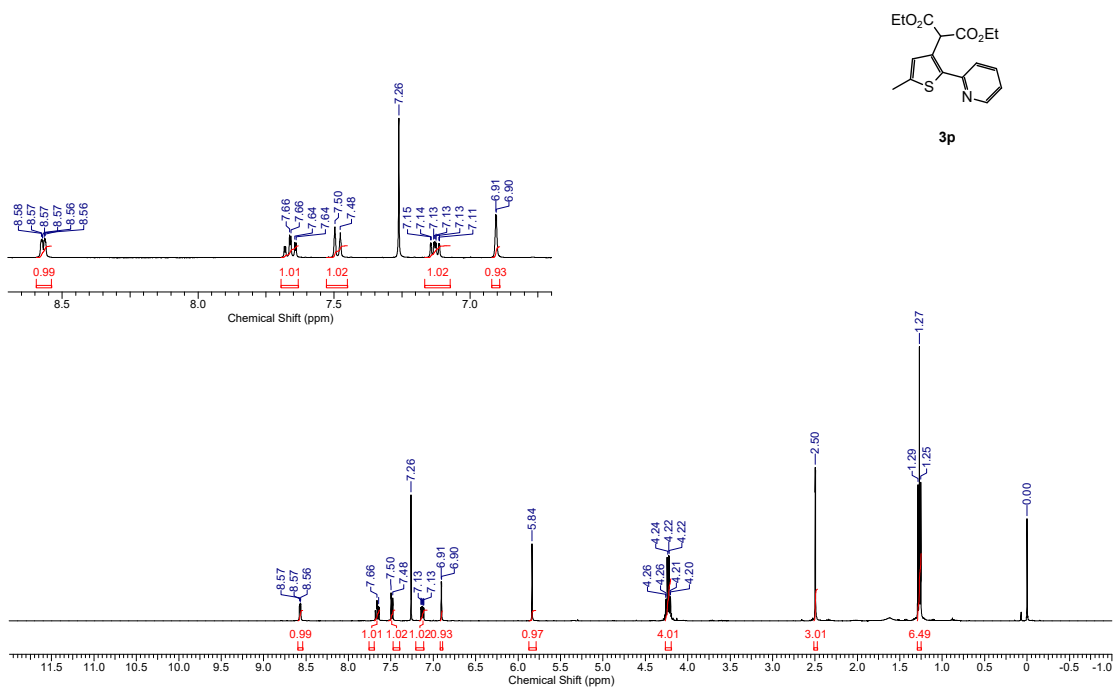

Figure S45. <sup>1</sup>H NMR spectrum of compound 3p

3P 13C.ESP  
3P 13C.ESP

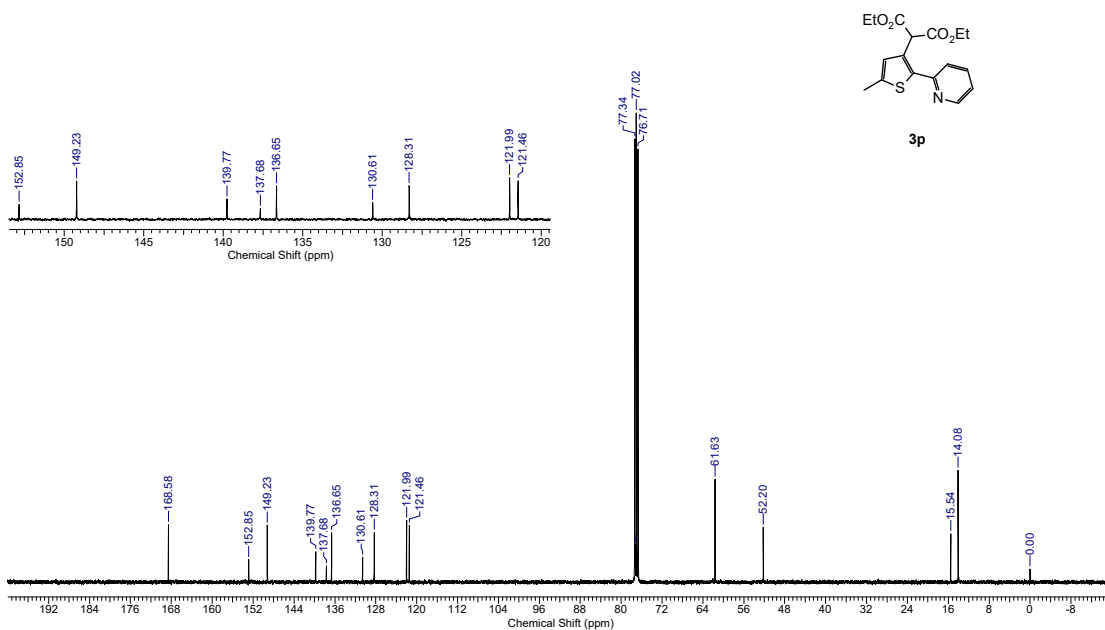

Figure S46. <sup>13</sup>C NMR spectrum of compound 3p

3q.esp  
3q.esp

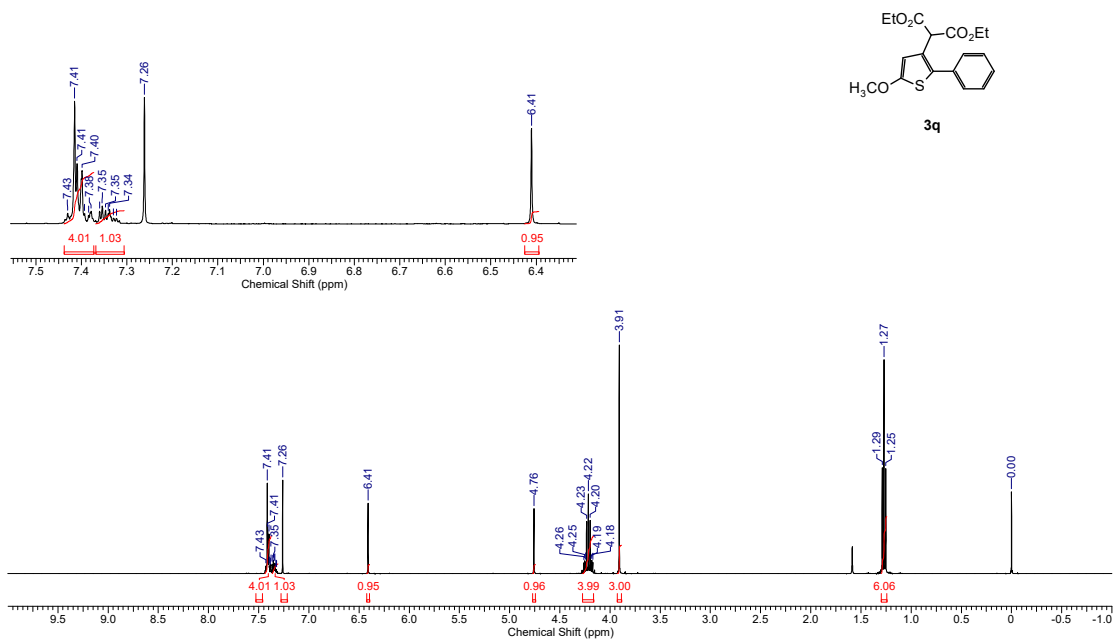

Figure S47. <sup>1</sup>H NMR spectrum of compound 3q

3Q 13C.ESP  
3Q 13C.ESP

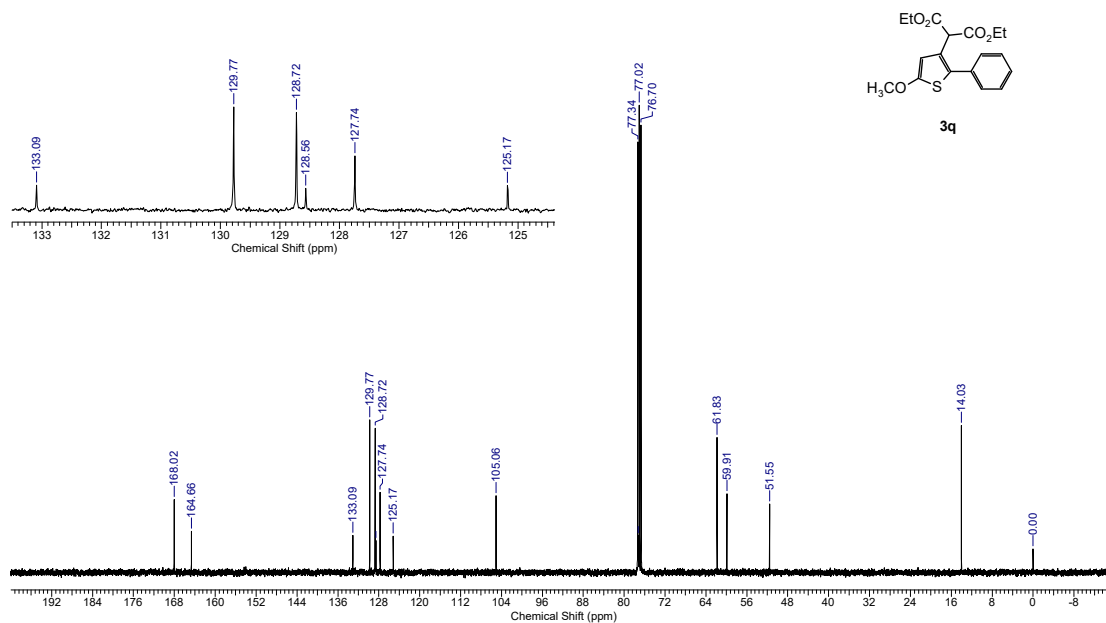

Figure S48. <sup>13</sup>C NMR spectrum of compound 3q

3R.ESP  
3R.ESP

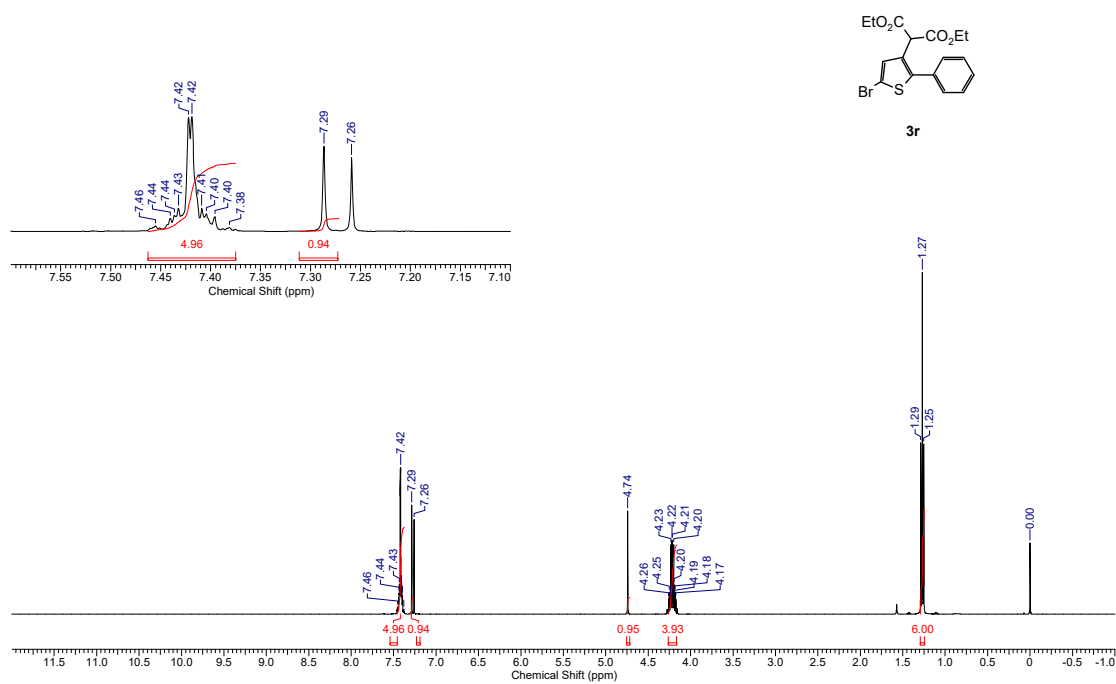

Figure S49. <sup>1</sup>H NMR spectrum of compound 3r

3R 13C.ESP  
3R 13C.ESP

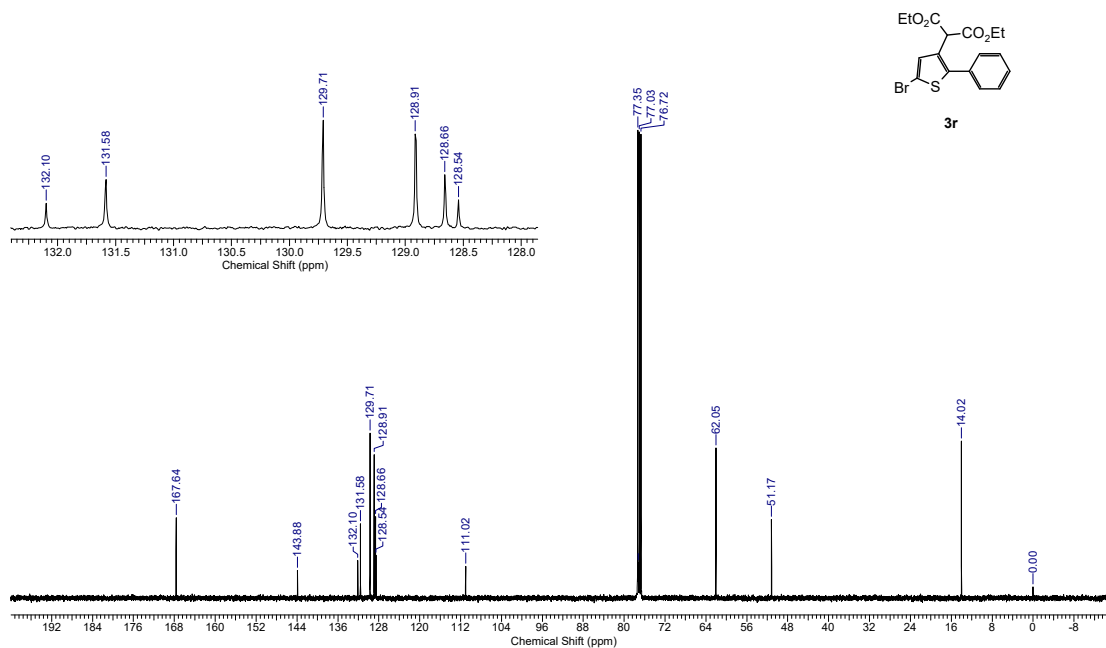

Figure S50. <sup>13</sup>C NMR spectrum of compound 3r

3s.esp  
3s.esp

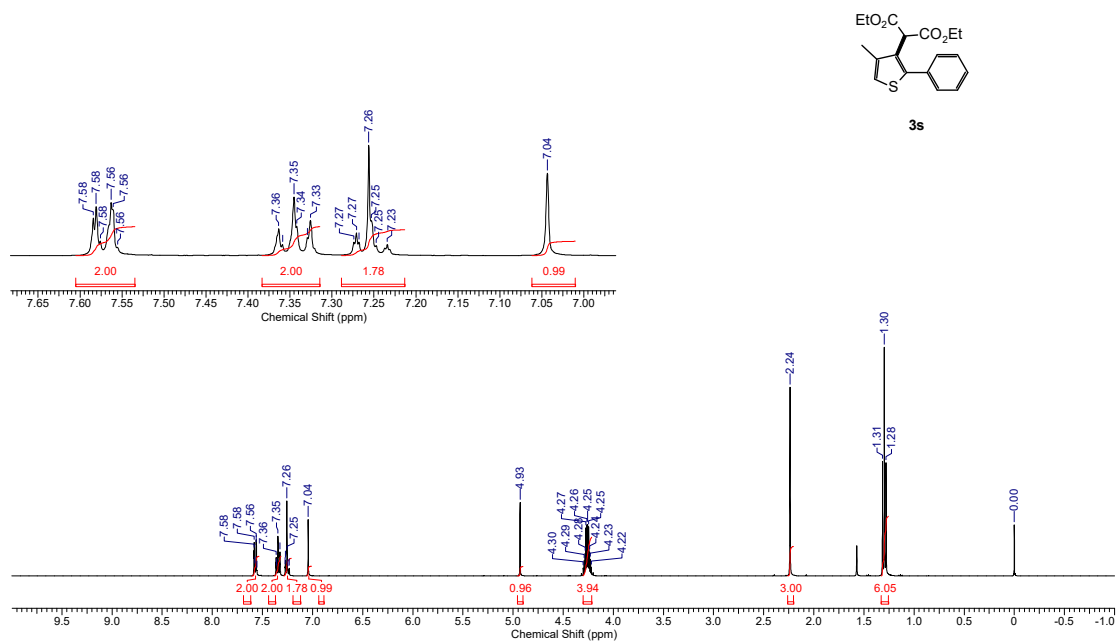

Figure S51. <sup>1</sup>H NMR spectrum of compound 3s

3S 13C.ESP  
3S 13C.ESP

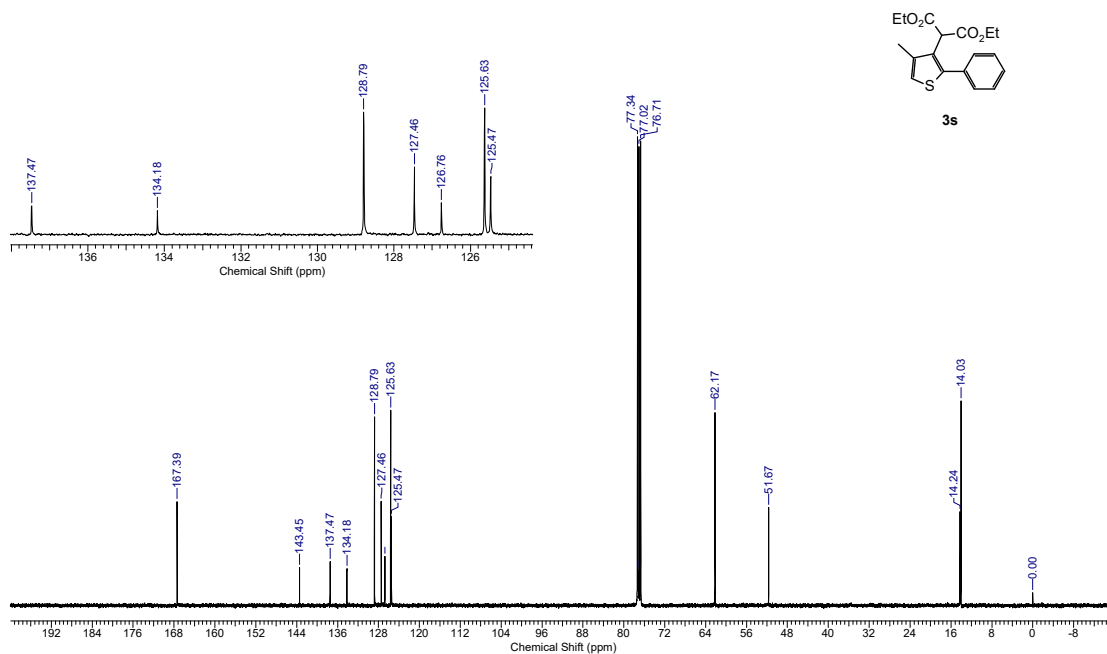

Figure S52. <sup>13</sup>C NMR spectrum of compound 3s

3T.ESP  
3T.ESP

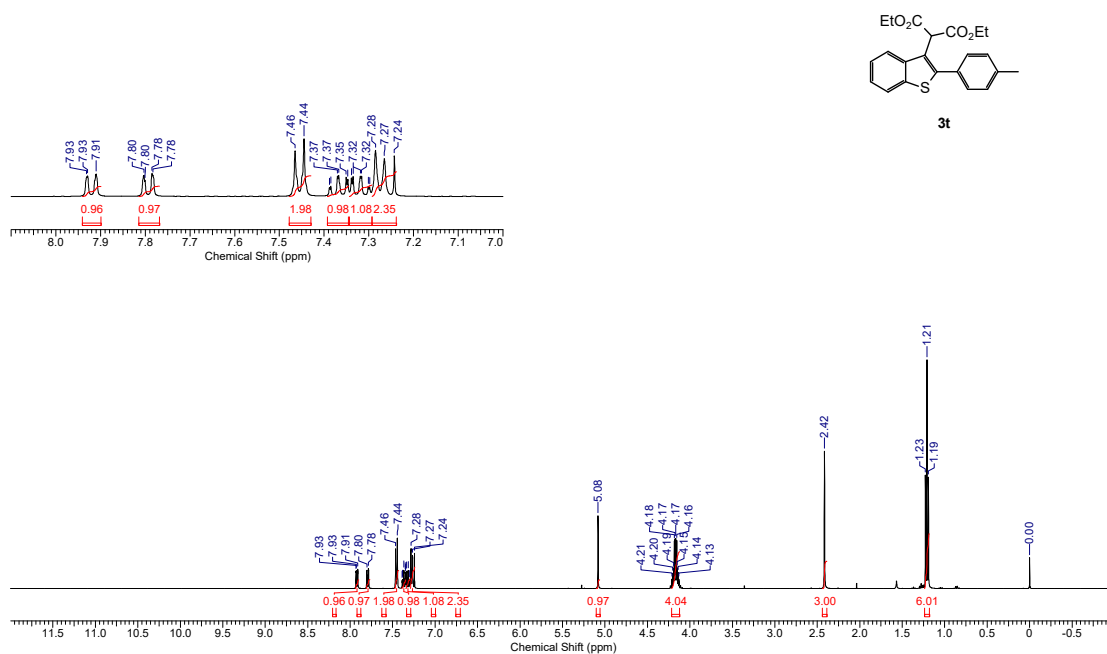

Figure S53. <sup>1</sup>H NMR spectrum of compound 3t

3t-13C.esp  
3t-13C.esp

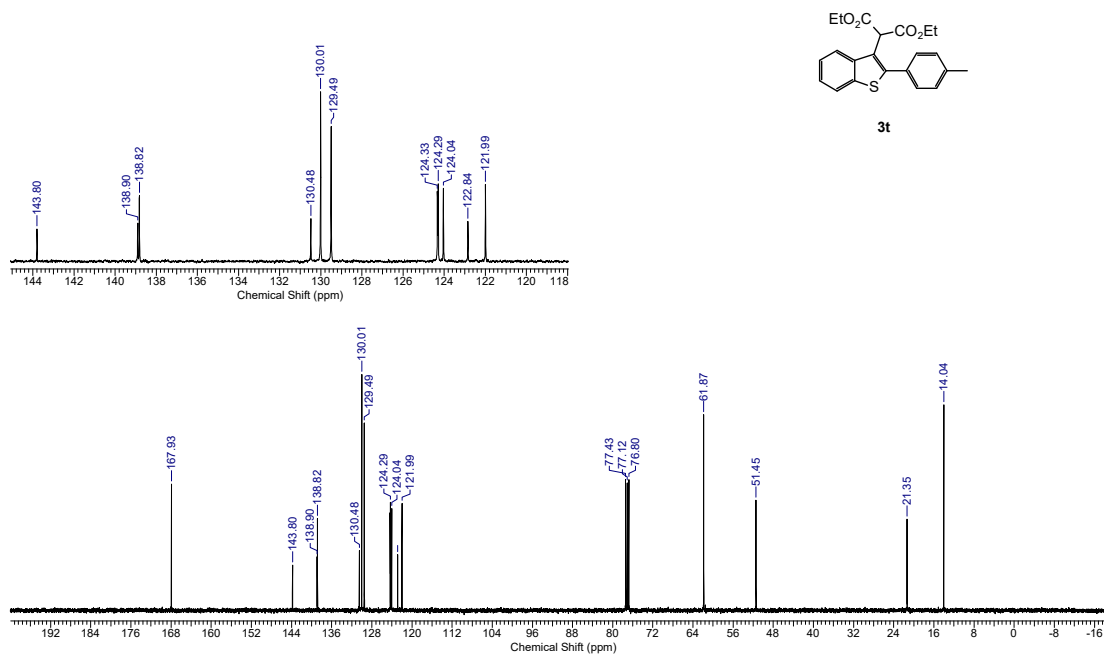

Figure S54. <sup>13</sup>C NMR spectrum of compound **3t**

3u.esp  
3u.esp

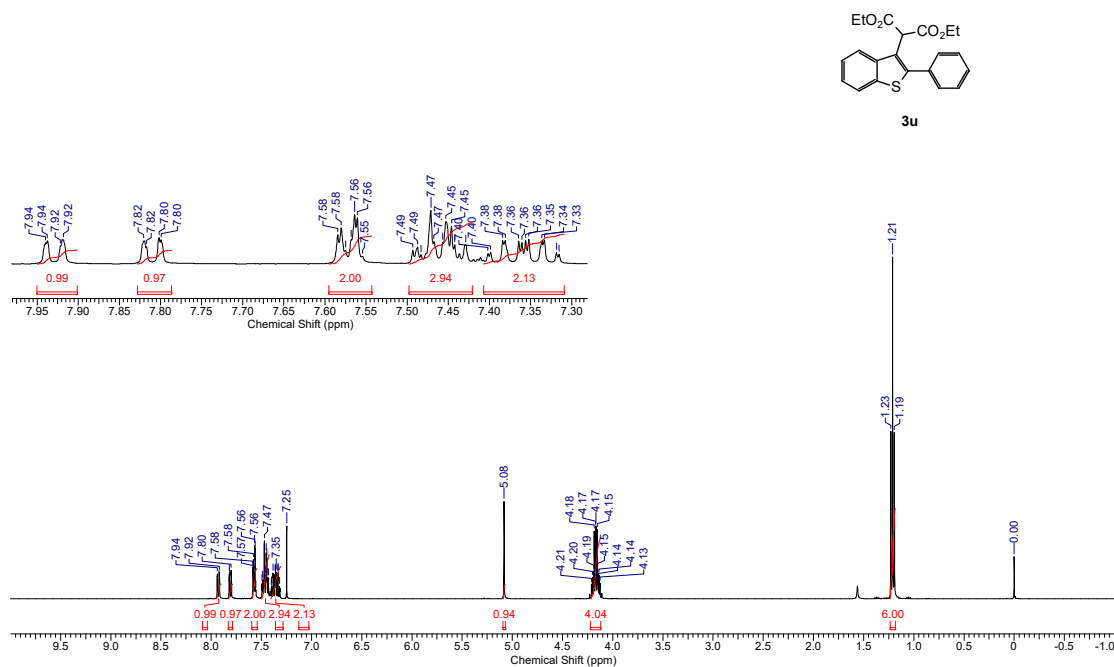

Figure S55. <sup>1</sup>H NMR spectrum of compound **3u**



3u 13C.esp  
3u 13C.esp

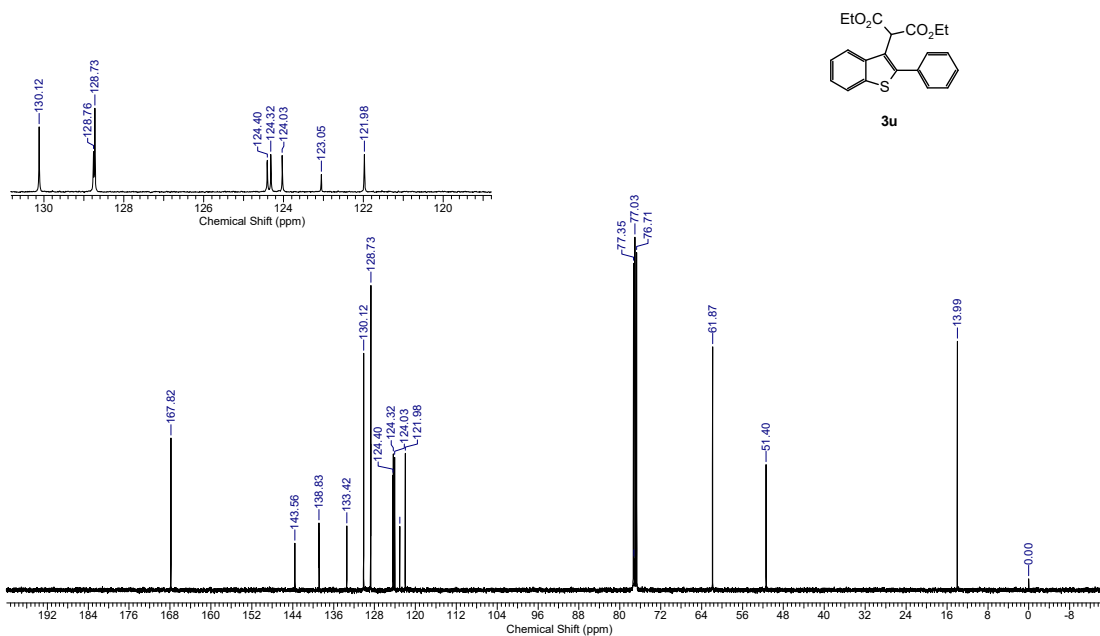

Figure S56. <sup>13</sup>C NMR spectrum of compound **3u**

3v.esp  
3v.esp

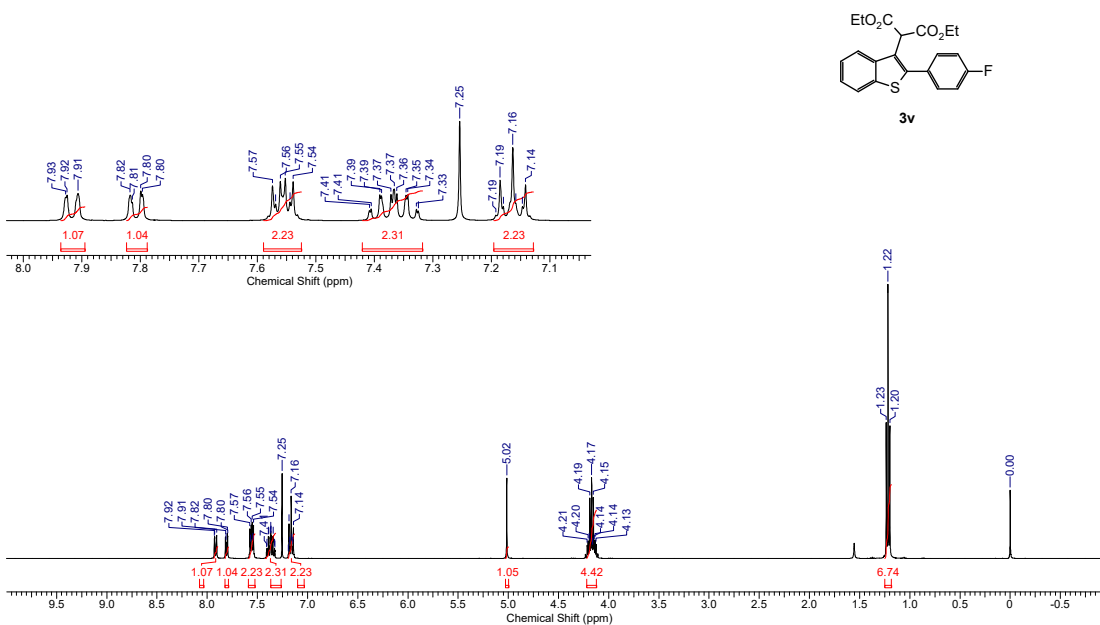

Figure S57. <sup>1</sup>H NMR spectrum of compound **3v**

3V 13C.ESP  
3V 13C.ESP

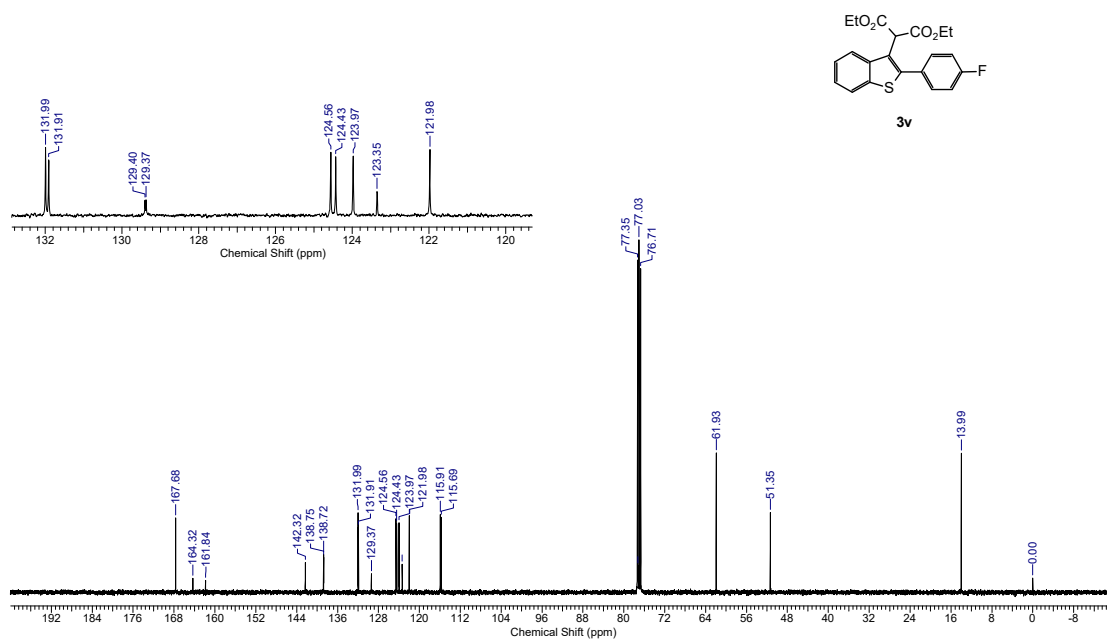

Figure S58. <sup>13</sup>C NMR spectrum of compound of 3v

3v 19F.esp

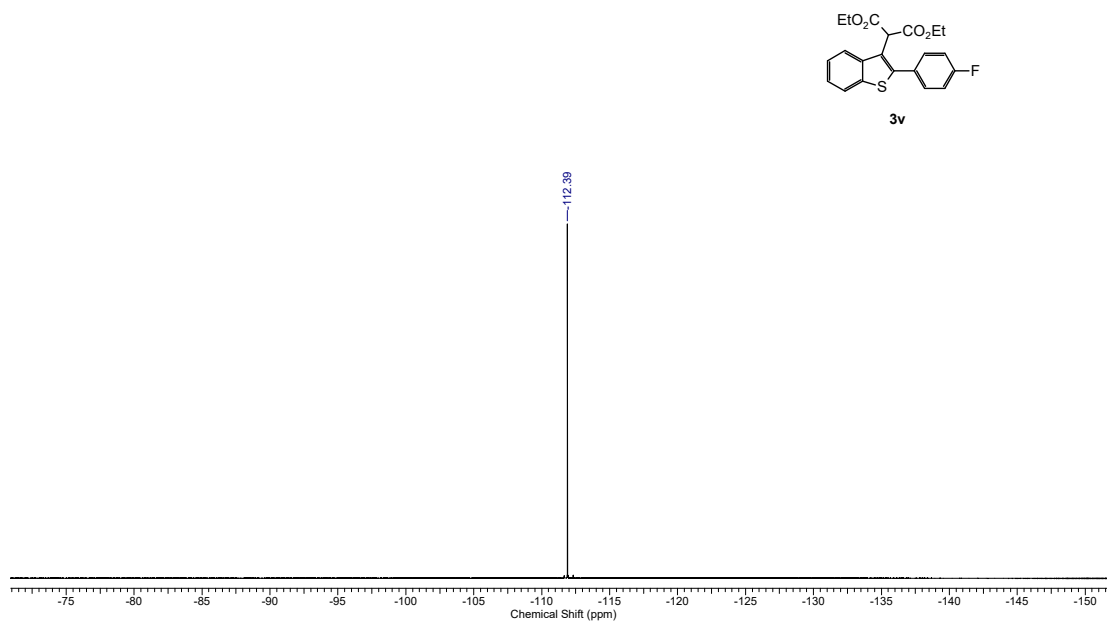

Figure S59. <sup>19</sup>F NMR spectrum of compound 3v

3w.esp  
3w.esp

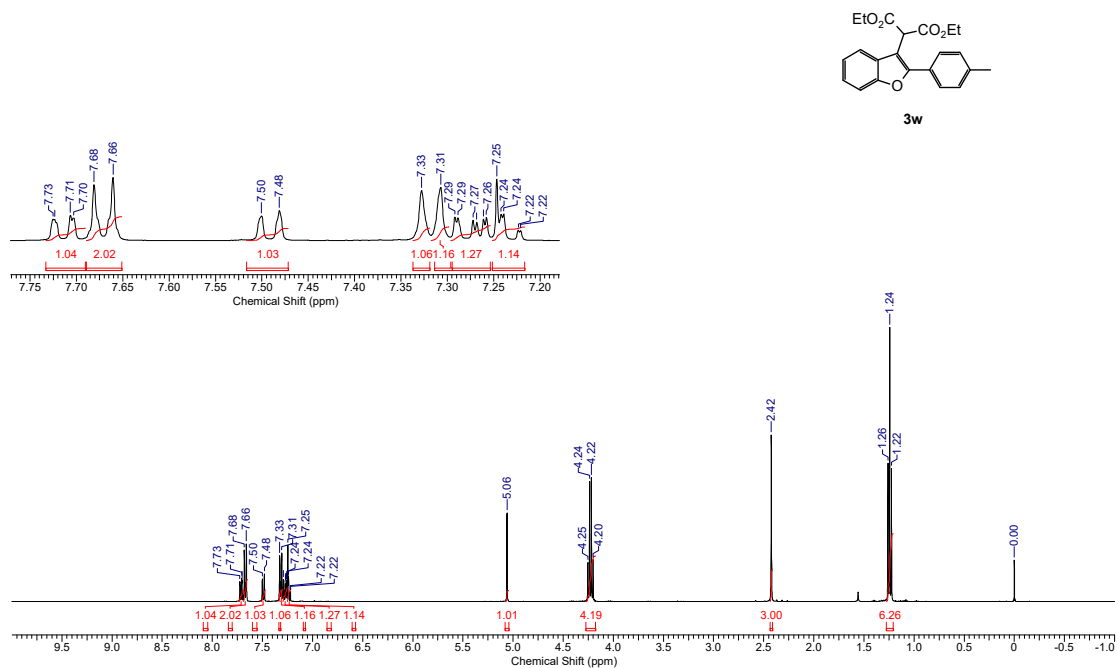

Figure S60.  $^1\text{H}$  NMR spectrum of compound **3w**

3W.13C.ESP  
3W.13C.ESP

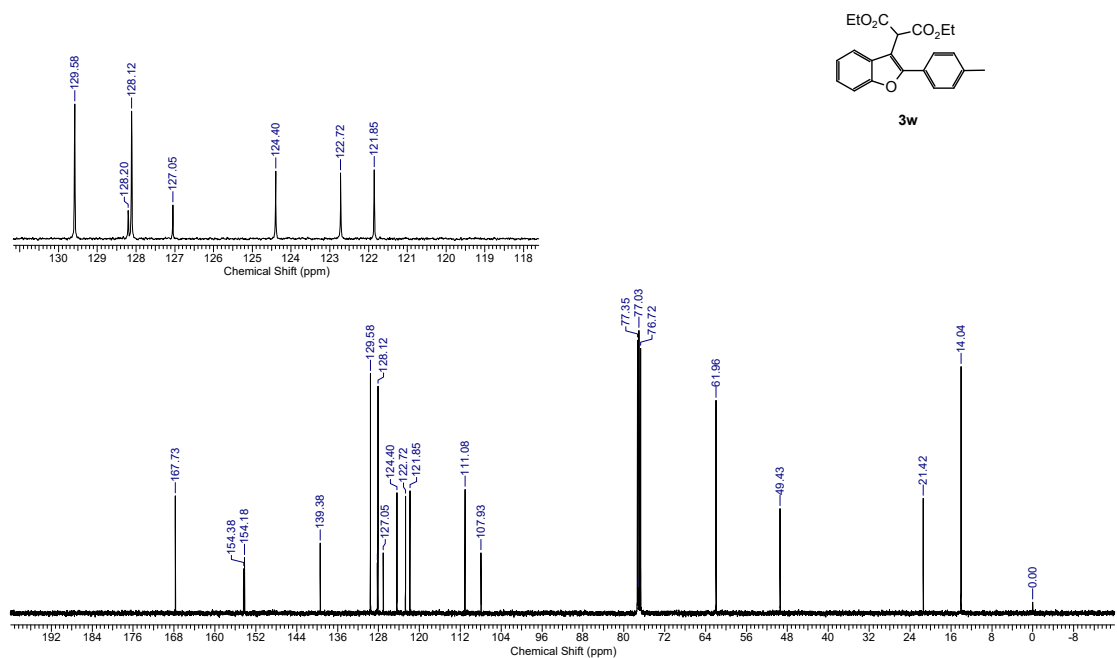

Figure S61.  $^{13}\text{C}$  NMR spectrum of compound **3w**

3x.esp  
3x.esp

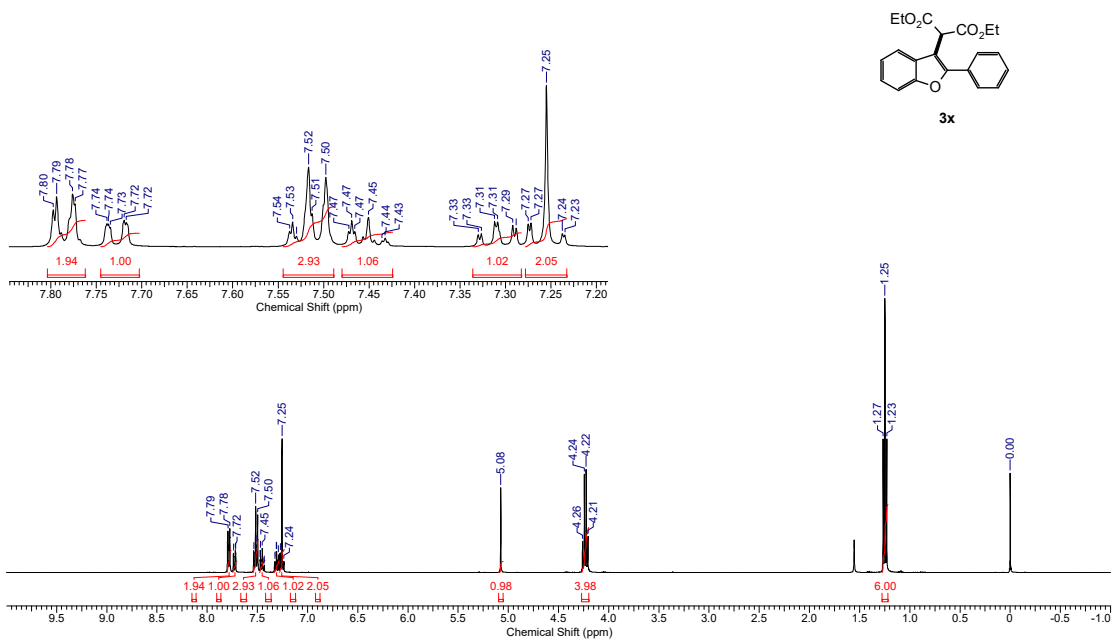

Figure S62. <sup>1</sup>H NMR spectrum of compound 3x

3x13C.esp  
3x13C.esp

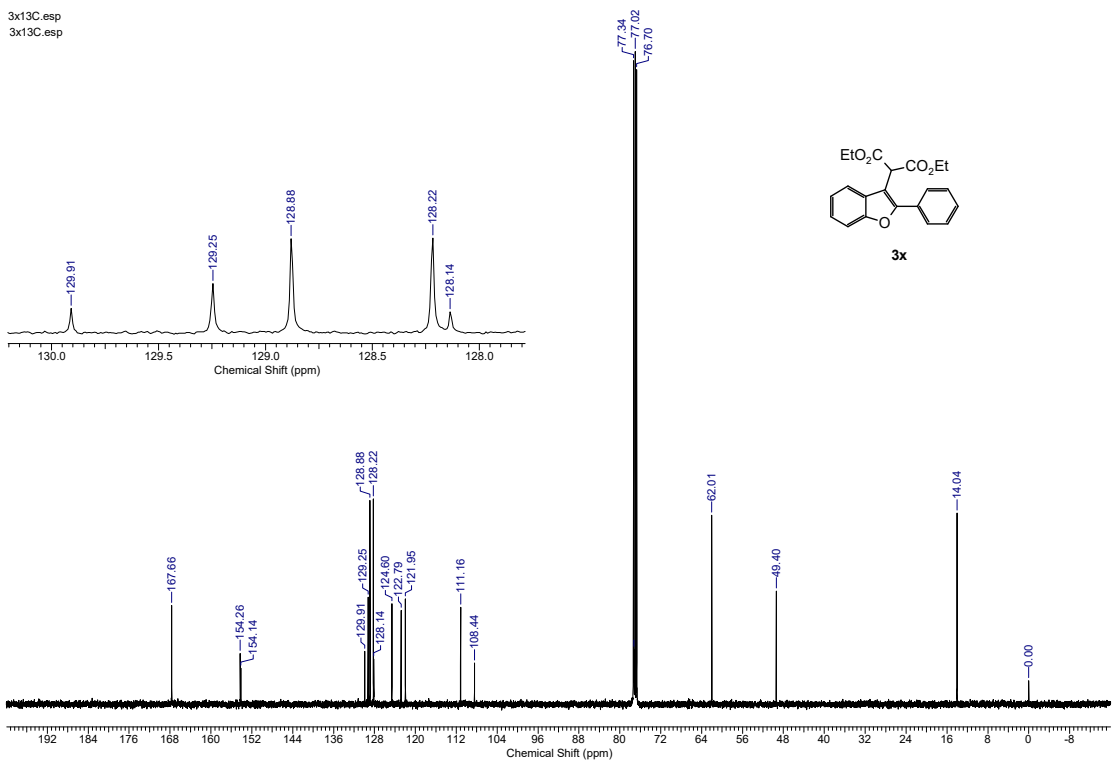

Figure S63. <sup>13</sup>C NMR spectrum of compound 3x

3y.esp  
3y.esp

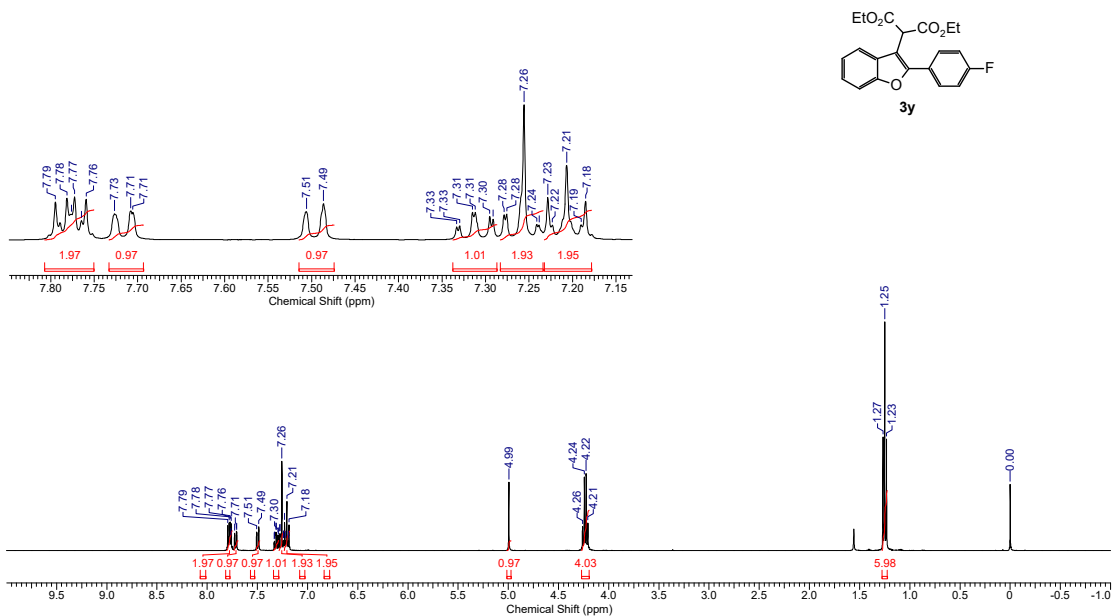

Figure S64. <sup>1</sup>H NMR spectrum of compound **3y**

3y.13C.esp  
3y.13C.esp

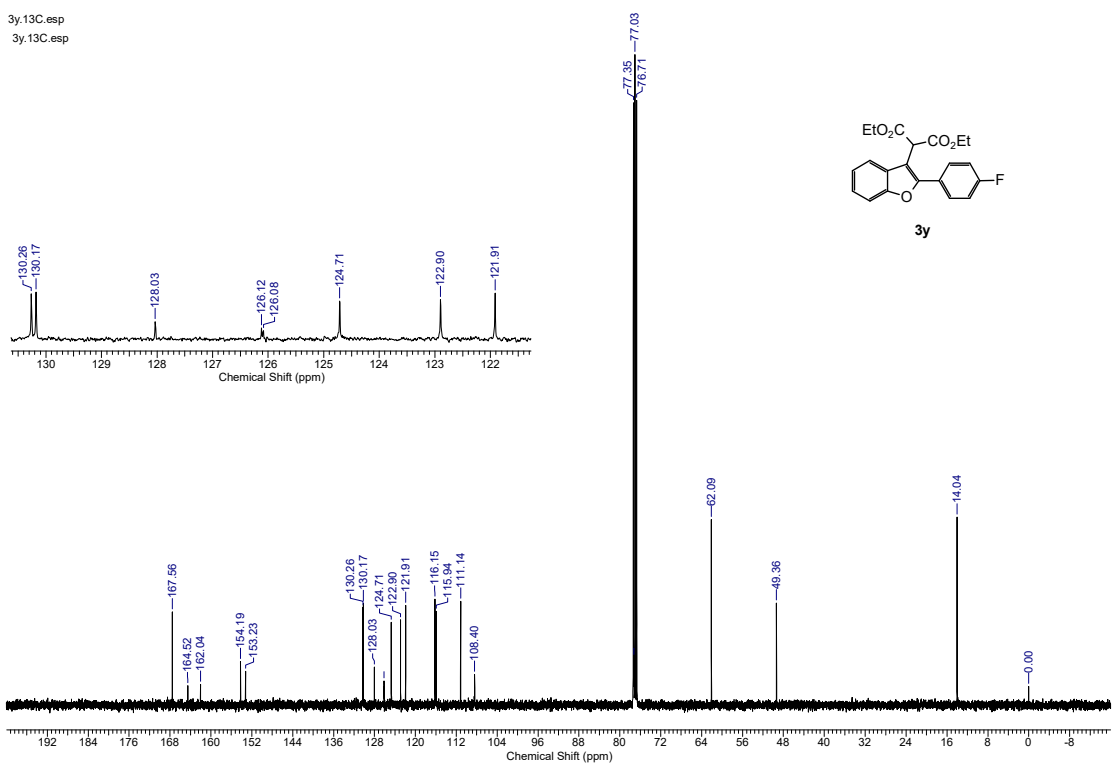

Figure S65. <sup>13</sup>C NMR spectrum of compound **3y**

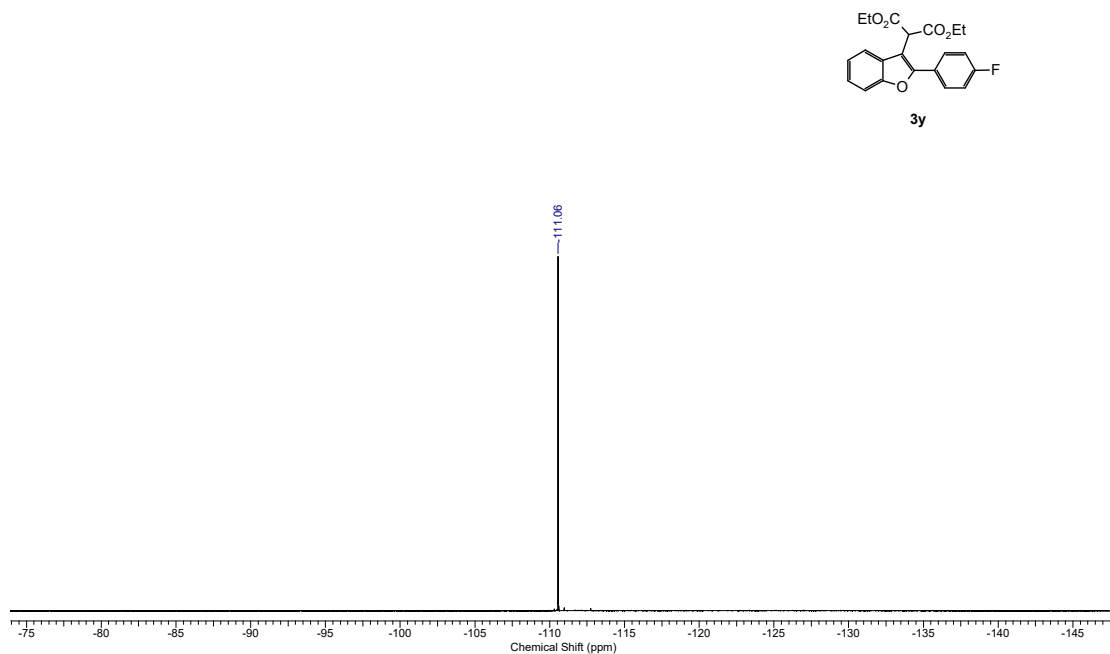Figure S66. <sup>19</sup>F NMR spectrum of compound **3y**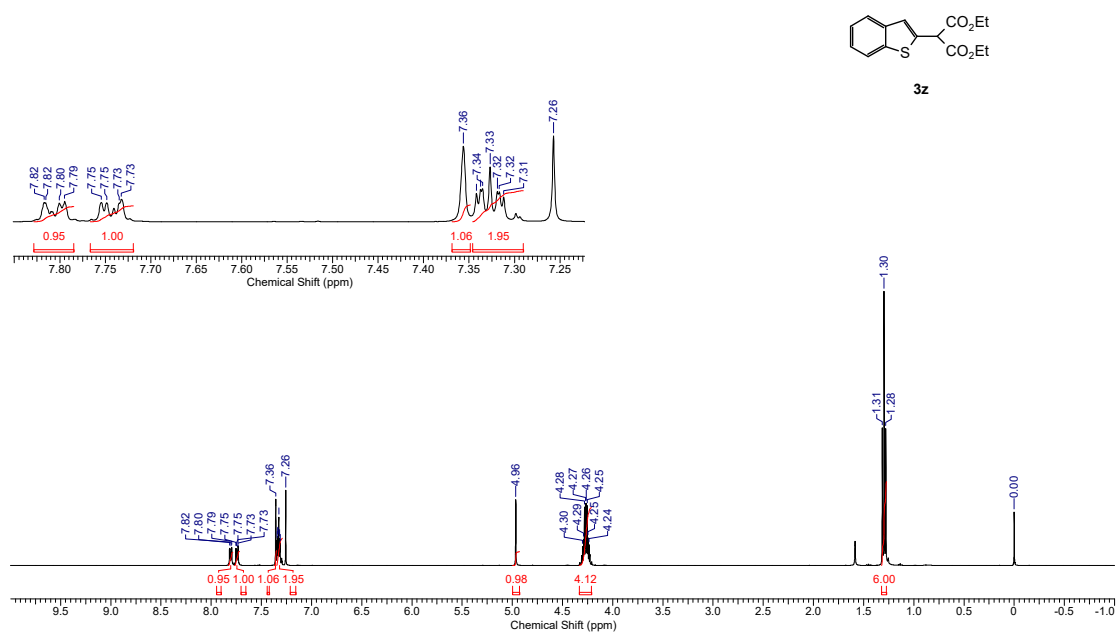Figure S67. <sup>1</sup>H NMR spectrum of compound **3z**

3z.13C.esp  
3z.13C.esp

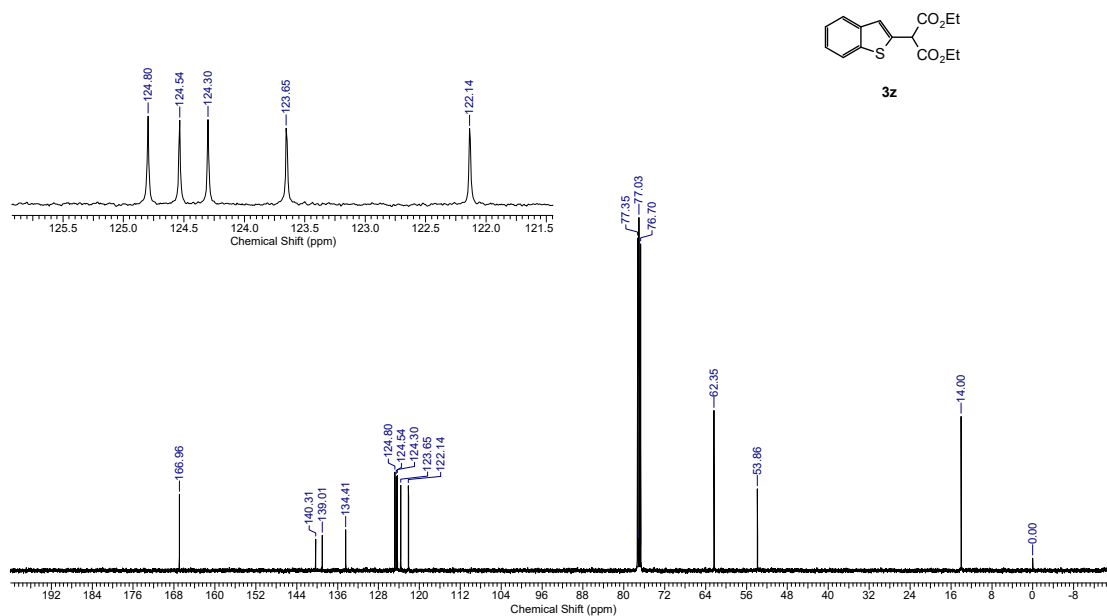

Figure S68. <sup>13</sup>C NMR spectrum of compound **3z**

3AA.ESP  
3AA.ESP

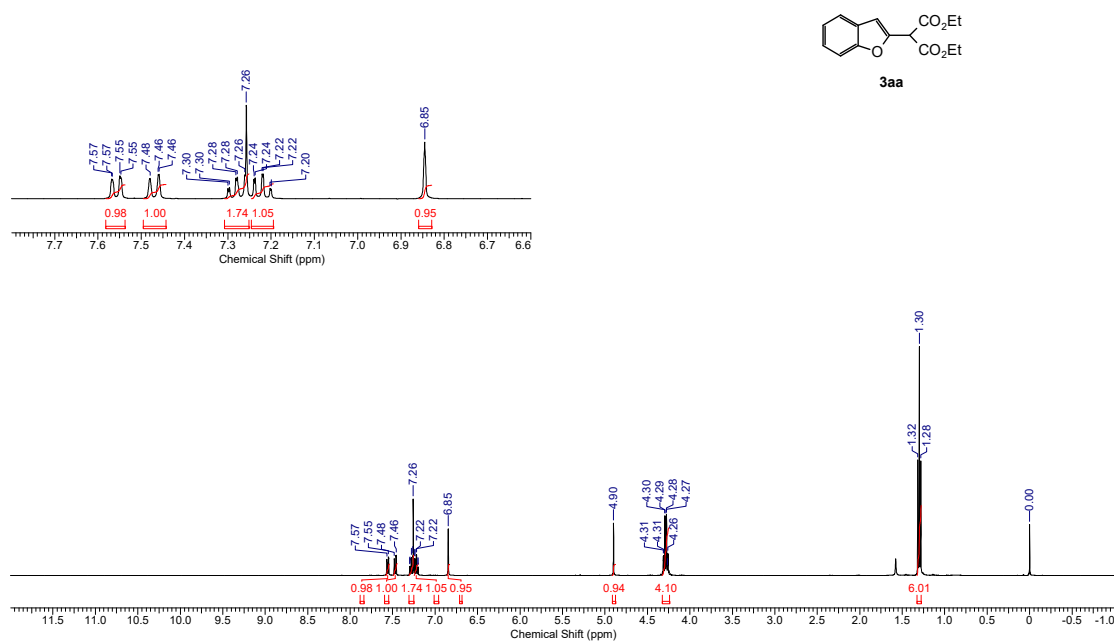

Figure S69. <sup>1</sup>H NMR spectrum of compound **3aa**

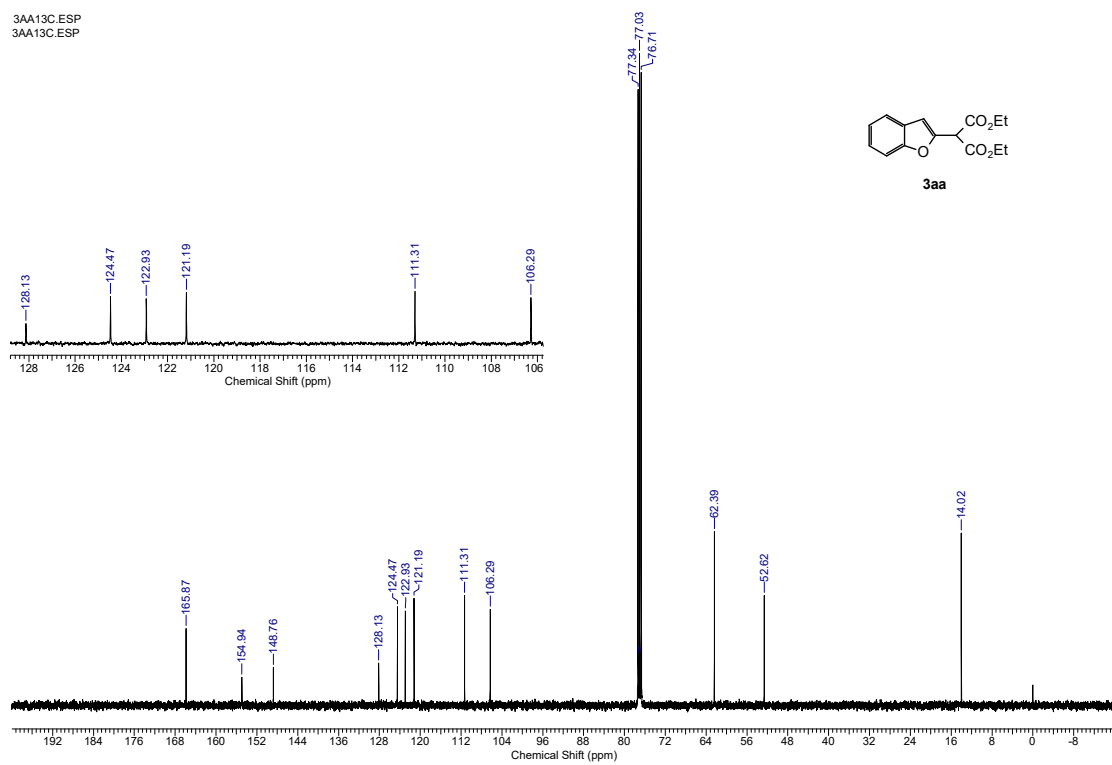

Figure S70.  $^{13}\text{C}$  NMR spectrum of compound **3aa**
